# Supplementary material for: SKiM - A generalized literature-based discovery system for uncovering novel biomedical knowledge from PubMed
Source: bioRxiv preprint, doi:10.1101/2020.10.16.343012, version 1 (2020-10-17)
Supplement: Supplementary Data 8 [file 343012_file20.xlsx]

## Sheet: T2D
Drug (C)	DDA (E1)	DDA + Manual annotation (A-C) (E2)			DDA + Manual annotation (A-C / A-B-C) (E3)				First Clinical Trial - PMID (Year)	First co-occurrence of A and C in PubMed - PMID (Year)	First literature indicating the usefulness of C for A - PMID (Year)
		Evaluation metric	Literature evidence (PMID)	Other evidence	Annotation	Literature evidence (A-B)	Literature evidence (B-C)	Phenotype (B)
Cut-off date for SKiM execution: March 2019
Type 2 diabetes (T2D)
Glucose injection	FP	FP	N/A	N/A	FP	N/A	N/A	N/A	N/A	N/A	N/A		Color coding:
Glucose-6-Phosphate	FP	FP	N/A	N/A	FP	N/A	N/A	N/A	N/A	N/A	N/A		DDA
Glucose	FP	FP	N/A	N/A	FP	N/A	N/A	N/A	N/A	N/A	N/A		Manual curation - A-C
2-NBDG	FP	FP	N/A	N/A	FP	N/A	N/A	N/A	N/A	N/A	N/A		Manual curation - A-B-C
3 O Methylglucose	FP	FP	N/A	N/A	FP	N/A	N/A	N/A	N/A	N/A	N/A		?? May be a positive association
Riociguat	FP	FP	N/A	N/A	TP	24582094	23883378	Hypertension	N/A	N/A	N/A		Negative association
Treprostinil	FP	TP	32268788	N/A	TP	N/A	N/A	N/A	N/A	32268788 (2020)	32268788 (2020)		SKiM predicted the drug even before the first co-occurrence of the drug and the disease in a PubMed abstract
Dapagliflozin	TP	TP	N/A	DDA	TP	N/A	N/A	N/A	19114612 (2009)	18260618 (2008)	18260618 (2008)		SKiM predicted the drug even before the first PubMed confirming the usefulness of the drug for the condition
Hagedorn Insulin, Protamine	FP	TP	29961246	N/A	TP	N/A	N/A	N/A	3062266 (1988)	3062266 (1988)	3062266 (1988)
Ambrisentan	FP	FP	N/A	N/A	TP	24582094	18506008	Hypertension	N/A	N/A	N/A		*Coocurrence only
2-deoxyglucose	FP	FP	N/A	N/A	FP	N/A	N/A	N/A	N/A	N/A	N/A
Canagliflozin	TP	TP	N/A	DDA	TP	N/A	N/A	N/A	21457428 (2011)	20690635 (2010)	20690635 (2010)		Types of evaluation
Empagliflozin	TP	TP	N/A	DDA	TP	N/A	N/A	N/A	23328275 (2013)	21985634 (2012)	21985634 (2012)		E1: Evaluation using DDA
Phlorizin	FP	FP	N/A	N/A	TP	28544066	3571496	Glucose intolerance	N/A	11159708 (2001)	N/A		TP @20 =	5
Nateglinide	TP	TP	N/A	DDA	TP	N/A	N/A	N/A	10720043 (2000)	10720043 (2000)	10720043 (2000)		FP @20 =	15
Chlorozotocin	FP	FP	N/A	N/A	FP	32363634	3156601*	Hyperglycemia	N/A	N/A	N/A		Precision @20 =	0.25
Agents, Antihypertensive	FP	FP	N/A	N/A	??	24582094	??	Hypertension	N/A	N/A	N/A
Insulin-lispro	FP	TP	29355435	N/A	TP	N/A	N/A	N/A	9314631 (1997)	9314631 (1997)	9314631 (1997)		E2: E1 and A-C literature evidence
Insulin Degludec	TP	TP	N/A	DDA	TP	N/A	N/A	N/A	21285389 (2011)	21285389 (2011)	21285389 (2011)		TP @20 =	9
Alirocumab	FP	TP	32035487	N/A	TP	N/A	N/A	N/A	28206704 (2017)	27478094 (2016)	27478094 (2016)		FP @20 =	11
Gluconic Acid													Precision @20 =	0.45
Insulin Lispro
Insulin Aspart													E3: E1, E2 and A-B-C literature evidence
Levemir													TP @20 =	12
Insulin Detemir													FP @20 =	7
Desoxycorticosterone acetate													Precision @20 =	0.6
Acarbose
Bosentan													TP (all predictions) =	75
Fructose													FN (all predictions) =	20
Paricalcitol													Recall (all predictions) =	0.7895
alpha glucosidase inhibitors
Repaglinide
vildagliptin
Amlodipine
Insulin Glargine
orlistat
Dipeptidyl-Peptidase 4 Inhibitors
Glimepiride
Renagel
Glucagon
Evolocumab
Olmesartan
Pancreatic hormones
Peginesatide
Sitagliptin Phosphate
Xylose
Nebivolol
Labetalol
Aliskiren
Perindopril
exenatide
Sulfonylurea Compounds
Streptozocin
Sibutramine
Gliclazide
fructose 2,6-biphosphate
Febuxostat
Liraglutide
Renin-inhibitors
Angiotensin 2 Receptor Blocker
Irbesartan
aristolochic acid
Lisinopril
Telmisartan
Phosphoenolpyruvate
D-(+)-maltose
Oxonic Acid
Valsarran
Peritoneal dialysis fluid
Metformin
Doxazosin
Tolbutamide
Leptin
Thiazolidinedione
UDP-alpha-D-glucuronate
Enalaprilat
fructose 1,6-diphosphate
Isradipine
galactose
Hydralazine
ACE inhibitors
Candesartan
Regular Insulin, Human
Deoxycorticosterone
Cinacalcet
glucans
fructose 1,6 bisphosphate
Methyldopa
Triglycerides
Felodipine
Pima brand of potassium iodide
Eplerenone
Diazoxide
Atenolol
Losartan
Phentermine
Insulin Pork
saxagliptin
rosiglitazone
Xylitol
Aldosterone
Ezetimibe
acadesine 5'-monophosphate
Angiotensin II
Calcium channel blocking agents
pioglitazone
Benzbromarone
Fibrates
5-hydroxymethyl-2-furaldehyde
Latanoprost
D-glucitol
Enzyme Antagonist
Diuretics
Alglucosidase Alfa
Glyburide
troglitazone
D-Mannose
Sildenafil
Acepromazine
Beta-Adrenergic Blocking Agent
Fludeoxyglucose F-18
Ciloprost
Biguanide antimalarial
Adofen
Chlorothalidone
Agents, Vasodilator
Nitrendipine
Chlorothiazide
Rasburicase
Creatinine
Methylglyoxal
Spironolactone
Cytochalasin B
Timolol
intralipid
Nicardipine
Carbohydrates
Uric Acid
Glucosamine
Lactose
Carvedilol
Manitol
Metoprolol
Cholestyramine
Probucol
Cellulase
rimonabant
Palmitinic acid
Agents, Vasoconstrictor
Phenformin
fluvastatin
Epoprostenol
Starch
Ramipril
Sucrose
Simvastatin
Calcium Acetate
N-acetylglucosamine
Adrenergic alpha blockers
Dihydropyridines
Cholesterol
Phosphocreatine
Hypolipidemic Agents
HMG-CoA reductase inhibitor
Iohexol
Calcineurin Antagonists
Succinic acid
Allopurinol
2,4-Dinitrophenol
Pregabalin
Sodium Nitroprusside
2-ketoglutarate
Ranibizumab
L-Carnitine
Rosuvastatin Calcium
Brain natriuretic peptide
Lactic acid
Somatostatin
Prazosin hydrochloride
Didehydrodeoxythymidine
2-Aminoglutaramic acid
Organic acids
Mycophenolate mofetil
Somatropin
Nifedipine
Diltiazem
Mecasermin
Wortmannin
Urea
dichloroacetic acid
Mycophenolate
Clonidine
Citric acid
Inulin
Oxaliplatin
Darbepoetin alfa
Catecholamines
Velcade
Dihydronicotinamide adenine dinucleotide phosphate
Antibodies, Antineutrophil Cytoplasmic
Aminolevulinic Acid
Niacin
Clofibrate
Nicotinamide adenine dinucleotide
Propranolol
Saccharomyces cerevisiae allergenic extract
Phosphates
Electrolytes
Butyricum acidum, butyric acid, Homeopathic preparation
Parathyroid Hormone
Adenosine Triphosphate
Uridine
Pancreatin
Glycerol trinitrate
Noradrenaline
Polysaccharides
Taxane
Gabapentin
Hydrocortisone acetate
Contrast Media
Cellulose
Taxanes, antineoplastic
Antigen antibody complex
Candida albicans antigen
Androgen Analogs
Inositol
Cardiac glycosides
Onion
Cyclophosphamide
Creatine
Bilirubin
Orgotein
6-Aminopurine
Verapamil
17-deoxycortisol
Formic Acid
Enzymes
Docosahexaenoic Acids
Potassium
Activated charcoal
Retinal
Glutathione
Bevacizumab
Ammonia
Glutamic acid
Adenosine monophosphate
Epinephrine
Vasopressin
Polyphenols
Lovastatin
Acetic acid
Eicosapentaenoic Acid
Calcitriol
Blood Coagulation Factor I
800 Sodium Bicarbonate Powder
Prostaglandins
2-Aminosuccinic acid
Dioxygen
Paclitaxel
Hydrogen peroxide
Sodium choride
Highly active antiretroviral therapy (haart)
Isococaine
Sirolimus
Nitrogen
Leucine
Birth contraceptive control pills
Gangliosides
Ascorbic Acid
Bovine casein
Cyclic AMP
Adenosine
Sex Steroid Hormones
Alkaline Phosphatase
Glucocorticoids
Phytosteroids
Antioxidants
Indapamide
Protamine
L-Arginine
Daunorubicin
Tacrolimus
Azathioprine
Vitamin D
Agents, Immunosuppressive
2,6-diaminohexanoic acid
Magnesium
Magnesium
Selenium
Calcium
Phosphorus
Fatty Acids, Omega-3
Ipilimumab
L-threonine
Cyclosporine
Methyltestosterone
Acetylcysteine
Tricalcium phosphate
Liothyronine
Chlordiazepoxide
Agents, Anticoagulant
Alcohol, Dehydrated
Serum albumin
2-aminoacetic acid
Xanthine
Carboplatin
L-serine
Quilostigmine
Leurocristine
Prednisone
Acetylcholine
Element K
Vitamins
Vitamin J
Brompheniramine maleate
Folic acid
Androgens
Hypoxanthine
L-tyrosine
Octreotide acetate
Aspartame
Purified water
Nitric oxide
Calmorex
Oxyphenbutazone
Chlorpromazine
S-adenosylmethionine
Agents, Antiinflammatory
Racemethionine
Adrenocorticotropic Hormone
Cephalexin
Fluorescein sodium
Carboquone
Antagonists, Protease
Hepatitis B antigen
Gamma globulins
Antipsychotic Drugs
Corticosteroids
Antigens
Atomic helium
Thyroid
Naproxen
Follicle-Stimulating Hormone
L-Methionine
Pindolol
Lorcaserin
Linagliptin
Lanthanum carbonate
Mineralocorticoids
Cilazapril
1 Sar 8 Ala Angiotensin II / Saralasin
Tocopherols
Cholic acid
Platinum
Minoxidil
Appetite Depressants
Lomitapide
Tempol
Valine
Mipomersen
Trandolapril
Glipizide
Sodium chloride
Aldosterone antagonists
Pancreozymin
Quinapril
Abacavir
Bezafibrate
Fish oil
Oubain
Dextrine
Dexamethasone
Basiliximab
9-Octadecenoic Acid
Furosemide
Agents, Sympathomimetic
Calcidiol
Diphenhydramine
Bendroflumethiazide
Dexfenfluramine
Aminoethylsulfonic acid
Bisoprolol
Lipid A
Meprobamate
Triamcinalone
L-Proline
Thioctic Acid
Electrolyte solutions
Loop diuretics

## Sheet: T1D
Drug (C)	DDA (E1)	DDA + Manual annotation (A-C) (E2)			DDA + Manual annotation (A-C / A-B-C) (E3)				First Clinical Trial - PMID (Year)	First co-occurrence of A and C in PubMed - PMID (Year)	First literature indicating the usefulness of C for A - PMID (Year)
		Evaluation metric	Literature evidence (PMID)	Other evidence	Annotation	Literature evidence (A-B)	Literature evidence (B-C)	Phenotype (B)
Cut-off date for SKiM execution: March 2019
Type 1 diabetes (T1D)
Thyroid preparations	FP	FP	N/A	N/A	FP	30147887	1305710*	Grave's disease	N/A	N/A	N/A		Color coding:
Pig thyroid	FP	FP	N/A	N/A	FP	N/A	N/A	N/A	N/A	N/A	N/A		DDA
Thyroid Therapy	FP	FP	N/A	N/A	FP	N/A	N/A	N/A	N/A	24695447 (2014)	N/A		Manual curation - A-C
Thyroid	FP	FP	N/A	N/A	FP	N/A	N/A	N/A	N/A	N/A	N/A		Manual curation - A-B-C
Thyroid hormones	FP	FP	N/A	N/A	TP	28836234	22931855	Obesity	N/A	7862103 (1994)	21311427 (2011)		Diagnostic agent
Glucose Injection	FP	FP	N/A	N/A	FP	31792784	24231013*	Insulin resistance	N/A	10404514 (1999)	N/A		?? May be a positive association
Glucose-6-Phosphate	FP	FP	N/A	N/A	??	31792784	27284106	Insulin resistance	N/A	2393555 (1990)	N/A		Negative association
Isotonic sodium chloride	FP	FP	N/A	N/A	FP	31849842	15006850*	Hyperglycemia	N/A	N/A	N/A
Anhydrous Dextrose	FP	FP	N/A	N/A	FP	N/A	N/A	N/A	N/A	N/A	N/A		*Coocurrence only
2-NBDG	FP	FP	N/A	N/A	FP	N/A	N/A	N/A	N/A	N/A	N/A
3-o-methyl-d-glucose	FP	FP	N/A	N/A	FP	N/A	N/A	N/A	N/A	16143864 (2005)	N/A		Types of evaluation
Lixisenatide	FP	TP	N/A	ISRCTN registry (http://www.isrctn.com/ISRCTN00290196)	TP	N/A	N/A	N/A	N/A	25382096 (2014)	29620817 (2018)		E1: Evaluation using DDA
Dulaglutide	FP	TP	31517629	N/A	TP	N/A	N/A	N/A	31517629 (2019)	25382096 (2014)	27485823 (2016)		TP @20 =	0
Riociguat	FP	FP	N/A	N/A	TP	32008567	23883378	Hypertension	N/A	N/A	N/A		FP @20 =	20
Treprostinil	FP	FP	N/A	N/A	TP	32008567	31545126	Hypertension	N/A	N/A	N/A		Precision @20 =	0
Semaglutide	FP	FP	N/A	N/A	TP	32008567	29805980	Hypertension	N/A	31855395 (2019)	N/A
Thyroglobulin	FP	TP	8200296	N/A	TP	N/A	N/A	N/A	17299067 (2007)	2547682 (1989)	8200296 (1994)		E2: E1 and A-C literature evidence
Dapagliflozin	FP	TP	30352894	N/A	TP	N/A	N/A	N/A	25271207 (2015)	24622320 (2013)	25271207 (2015)		TP @20 =	5
Isophane insulin	FP	TP	26589521	N/A	TP	N/A	N/A	N/A	8375267 (1993)	2147630 (1990)	8375267 (1993)		FP @20 =	15
Iodine therapy	FP	FP	FP	N/A	TP	30641774	10603730	Thyroiditis	N/A	15008298 (2003)	N/A		Precision @20 =	0.25
Canagliflozin
empagliflozin													E3: E1, E2 and A-B-C literature evidence
Ambrisentan													TP @20 =	10
Deoxyglucose													FP @20 =	9
Iodide-131													Precision @20 =	0.5263
saxagliptin
3,3,5 Triiodothyronine													TP (all predictions) =	20
Alogliptin													FN (all predictions) =	6
vildagliptin													Recall (all predictions) =	0.7692
Dipeptidyl-Peptidase 4 Inhibitors
Sitagliptin Phosphate
Linagliptin
Antirheumatic agent
Liraglutide
Meglitinide
Tiratricol
Phlorhizin
Antithyroid Agents
Nateglinide
Chlorozotocin
Agents, Antihypertensive
Thyroxine
insulin-lispro
Insulin Degludec
Glimepiride
Puromycin Aminonucleoside
Levemir
Insulin Glargine
Lanthanum carbonate
Gluconic Acid
Insulin Lispro
Insulin Detemir
Methimazole
Renagel
Insulin Aspart
Desoxycorticosterone acetate
Acarbose
Bosentan
Atlizumab
Fructose
Paricalcitol
alpha glucosidase inhibitors
Sulfonylurea Compounds
Sodium iodide
Repaglinide
Propylthiouracil
Amlodipine
exenatide
orlistat
Aurothiomalate Disodium
Glucagon
Peginesatide
Olmesartan
Pancreatic hormones
Tofacitinib
Thiazolidinedione
Xylose
Nebivolol
Labetalol
Leflunomide
Golimumab
Aliskiren
Perindopril
Metformin
Certolizumab
Gliclazide
Streptozocin
Sibutramine
Cerulein
fructose 2,6-biphosphate
Carbimazole
Renin-inhibitors
Auranofin
Angiotensin 2 Receptor Blocker
Pima brand of potassium iodide
Irbesartan
aristolochic acid
Retinal
Lisinopril
Telmisartan
Phosphoenolpyruvate
D-(+)-maltose
Valsarran
Peritoneal dialysis fluid
Liothyronine
Doxazosin
Tolbutamide
Leptin
Cinacalcet
UDP-alpha-D-glucuronate
Enalaprilat
fructose 1,6-diphosphate
Isradipine
galactose
Hydralazine
ACE inhibitors
Candesartan
Regular Insulin, Human
Deoxycorticosterone
pioglitazone
glucans
fructose 1,6 bisphosphate
Methyldopa
Tetrofosmin
Pokeweed
Triglycerides
Felodipine
Technetium (99m) Pentetate
Follicle-Stimulating Hormone
Eplerenone
Diazoxide
Atenolol
Losartan
Dipyridamole
Phentermine
Insulin Pork
rosiglitazone
Abatacept
Xylitol
Aldosterone
acadesine 5'-monophosphate
Angiotensin II
Calcium channel blocking agents
Fibrates
5-hydroxymethyl-2-furaldehyde
Latanoprost
D-glucitol
Enzyme Antagonist
Diuretics
Eculizumab
Alglucosidase Alfa
Inulin
Glyburide
troglitazone
Aminohippuric acid
Iodine-127
Dobutamine
D-Mannose
Sulfasalazine
Sildenafil
Biguanide antimalarial
decitabine
Acepromazine
Beta-Adrenergic Blocking Agent
Fludeoxyglucose F-18
Ciloprost
Secretin
Ranibizumab
Sestamibi
Iodide I-123
mitogens
Parathyroid Hormone
Ethopropazine
Adofen
Chlorothalidone
Creatinine
Agents, Vasodilator
Nitrendipine
Therapeutic Androstenedione
Probucol
Chlorothiazide
Factor VIII-von Willebrand Factor
Etanercept
Calcitriol
Somatropin
Methylglyoxal
Spironolactone
Antithrombin III
Iohexol
Cytochalasin B
Timolol
intralipid
Nicardipine
Carbohydrates
Gonadotropic Hormone
Selenium Sulfide
Azacitidine
Phosphocreatine
Potassium Iodide
Chorionic gonadotropin
Calcidiol
Rocuronium Bromide
Bromocriptine
Glucosamine
Methotrexate
Androgens
Levothyroxine
Creatine
Hydrocortisone acetate
Lactose
Aflibercept
Carvedilol
HMG-CoA reductase inhibitor
5-alpha Dihydrotestosterone
Methyltestosterone
Mecasermin
Manitol
Emtricitabine
Metoprolol
Penicillamine
Cellulase
Blood coagulation factor VIII
rimonabant
Biological products
Isosorbide
Palmitinic acid
Alfa1 antitrypsin
Agents, Vasoconstrictor
Bilirubin
Epoprostenol
Starch
Ramipril
Ezetimibe
Sucrose
4-Hydroxyproline
Monoclonal Antibody OKT3
Gonadorelin
Adrenocorticotropic Hormone
Blood coagulation factors
Antigen antibody complex
Alkaline Phosphatase
Blood Coagulation Factor I
Activated protein C
Calcium Acetate
Sex Steroid Hormones
N-acetylglucosamine
Adrenergic alpha blockers
Hypolipidemic Agents
Dihydropyridines
Cholesterol
Clostridiopeptidase A
Antithrombotic Agent
Alitretinoin
Interleukin-2
Isotretinoin
Somatostatin
Bromodeoxyuridine
Deoxythymidine
Darbepoetin alfa
Glycerol trinitrate
Monoclonal antibodies
Meprobamate
Mucopolysaccharides
Interleukin-2 Fusion Protein
Blood-coagulation factor II
Gamma globulins
Brain natriuretic peptide
Hydroxyprogesterone
Fibroblast Growth Factor 2
Fluorescein sodium
Vitamin D
Electrolytes
Vitamin B7
Granulocyte-macrophage colony-stimulating factor
Calcineurin Antagonists
Antiserum
Loop diuretics
Pancreozymin
CD142 Antigens
Amidotrizoic acid
Succinic acid
Ipilimumab
2,4-Dinitrophenol
Pregabalin
Sodium Nitroprusside
Rosuvastatin Calcium
Epinephrine
2-ketoglutarate
Glipizide
Furosemide
Sumatriptan
clopidogrel
Docosahexaenoic Acids
Vasopressin
L-Carnitine
Gadolinium
Alprazolam
Isoetharine
Methyprylon
Desmopressin
Aminolevulinic Acid
Dexamethasone
Catecholamines
B-Cell Activating Factor
Phenobarbital
Interleukin 1 Receptor Antagonist
Lactic acid
Levonorgestrel
Folic acid
Antigens
Cyanocobalamin
Prazosin hydrochloride
Interferon gamma-1b
Methanal
Vitamin J
Puromycin
Agents, Antiepileptic
Loratadine
2-Aminoglutaramic acid
Atomic helium
zirconium oxide
Organic acids
Simvastatin
Orgotein
Streptokinase
Glucocorticoids
Mycophenolate mofetil
Aspartame
Prostaglandin E2
Selenium
Retinoic Acid Agent
Hexachlorophene
Noradrenaline
Chlorpromazine
Calcium
Nitric oxide
Polysaccharide-K
Urea
Nifedipine
Diltiazem
Wortmannin
Bupivacaine
Alteplase, recombinant
Gastrin Pentapeptide
Clofibrate
Serum albumin
Mycophenolate
Potassium
Magnesium
Magnesium
Clonidine
Leucovorin
Antibodies, Antineutrophil Cytoplasmic
Citric acid
Chlordiazepoxide
L-Arginine
Oxaliplatin
Amiodarone
Bevacizumab
Glutathione
S-adenosylmethionine
Velcade
Cyclophosphamide
Leucine
Dihydronicotinamide adenine dinucleotide phosphate
Adenosine
2-Aminosuccinic acid
Quilostigmine
Brompheniramine maleate
Niacin
Histidine
L-tyrosine
Nicotinamide adenine dinucleotide
Propranolol
Saccharomyces cerevisiae allergenic extract
Phosphates
Protein A
Butyricum acidum, butyric acid, Homeopathic preparation
Dioxygen
Adenosine Triphosphate
Cyclic AMP
Sodium lauryl sulfate
Uridine
Enzymes
Pancreatin
Rye
Methylprednisolone
Polysaccharides
Taxane
Gabapentin
Dopamine
Lovastatin
Melatonin
Contrast Media
Cellulose
Taxanes, antineoplastic
Allopurinol
Uric Acid
Skeleton
Candida albicans antigen
Levodopa
Valproic acid
Androgen Analogs
Alcohol, Dehydrated
Ascorbic Acid
Hemostatic agents
Inositol
Indocyanine green
Isococaine
Fentanyl citrate
Cardiac glycosides
Onion
Beta blockers
Element K
Agents, Anticonvulsive
Tenofovir disoproxil
Octreotide acetate
6-Aminopurine
Verapamil
17-deoxycortisol
Anaesthetic local
Formic Acid
Triamcinalone
Lidocaine
Corticosteroids
Activated charcoal
Methylprednisolone Acetate
Ammonia
Prednisone
Trypsin inhibitor
Agents, Immunosuppressive
Glutamic acid
Adenosine monophosphate
Polyphenols
Adjuvant, Freund
Cephalexin
Acetic acid
Eicosapentaenoic Acid
Carisoprodol
800 Sodium Bicarbonate Powder
Prostaglandins
Hydroxychloroquine
4-Hydroxybutanoic Acid
Paclitaxel
Antipsychotic Drugs
Hydrogen peroxide
Sodium choride
Acetylcysteine
L-Methionine
Sirolimus
Nitrogen
Birth contraceptive control pills
Sincalide
Gangliosides
Bovine casein
Agents, Antidepressive
Gemcitabine
Antioxidants
Indapamide
Phosphorus
Protamine
Azathioprine
Interferons
Date allergenic extract
Tacrolimus
Tricalcium phosphate
Acetaminophen
2,6-diaminohexanoic acid
Heparin
Agents, Antiinflammatory
Fatty Acids, Omega-3
Chymotrypsin
L-threonine
Cyclosporine
Ranitidine
Oxyphenbutazone
Immunoadjuvants
Agents, Anticoagulant
Trypsin
2-aminoacetic acid
Amphetamine
Carboplatin
L-serine
Leurocristine
Acetylcholine
Vitamins
Tocopherols
Horseradish
4-aminobutyric acid
Gentamycin
Naproxen
Basiliximab
Purified water
Calmorex
Barley
Whole wheat allergenic extract
Interferon alfa-n3
Carboquone
Doxorubicin
Anti-anxiety agents
5 Hydroxytryptamine Uptake Inhibitors
Carbonyl iron
Serotonin
Pindolol
Hydrochloride, Sevelamer
Lorcaserin
Mineralocorticoids
vandetanib
Cilazapril
1 Sar 8 Ala Angiotensin II / Saralasin
Diphenhydramine
Hyaluronic acid
Bevacizumab injection
Platinum
Methacholine
Estrogens
Venlafaxine
Racemethionine
Minoxidil
Appetite Depressants
Vitamin D3
Tempol
Aminoglycoside antibacterials
Valine
Trandolapril
Rosmarinic acid
Sodium chloride
Aldosterone antagonists
Lenvatinib
Quinapril
Isoproterenol
Fish oil
Oubain
dichloroacetic acid
Dextrine
Vaccines
9-Octadecenoic Acid
Agents, Sympathomimetic
Protein S human
Medical air
Pancreatic lipase
Bendroflumethiazide
Dexfenfluramine
Aminoethylsulfonic acid
JAK Inhibitors
Malathion
Zeaxanthin
Chickenpox vaccine
Bisoprolol
Ivabradine
L-Proline
Ergometrine
Fluoride ion
Albiglutide
Thioctic Acid
Ropivacaine
Becaplermin
Electrolyte solutions
Hepatitis B antigen
Diclofenac
Reserpine
Caprylic acid

## Sheet: Atrial_fibrillation
Drug (C)	DDA (E1)	DDA + Manual annotation (A-C) (E2)			DDA + Manual annotation (A-C / A-B-C) (E3)				First Clinical Trial - PMID (Year)	First co-occurrence of A and C in PubMed - PMID (Year)	First literature indicating the usefulness of C for A - PMID (Year)
		Evaluation metric	Literature evidence (PMID)	Other evidence	Annotation	Literature evidence (A-B)	Literature evidence (B-C)	Phenotype (B)
Cut-off date for SKiM execution: March 2019
Atrial fibrillation
Sacubitril	FP	TP	30895821	N/A	TP	N/A	N/A	N/A	N/A	27277596 (2016)	30895821 (2019)		Color coding:
QT-prolonging drugs	FP	TP	15206999	N/A	TP	N/A	N/A	N/A	15206999 (2004)	11841151 (2002)	15206999 (2004)		DDA
WEB-2086	FP	FP	N/A	N/A	FP	N/A	N/A	N/A	N/A	N/A	N/A		Manual curation - A-C
Encainide	TP	TP	N/A	DDA	TP	N/A	N/A	N/A	93050 (1979)	93050 (1979)	93050 (1979)		Manual curation - A-B-C
CV-3988	FP	FP	N/A	N/A	FP	N/A	N/A	N/A	N/A	N/A	N/A		Diagnostic agent
Aldosterone antagonists	FP	TP	22641540	N/A	TP	N/A	N/A	N/A	N/A	9198852 (1994)	16304807 (2005)		SKiM predicted the drug even before the first PubMed confirming the usefulness of the drug for the condition
Nesiritide	FP	TP	15460174	N/A	TP	N/A	N/A	N/A	N/A	10831533 (2000)	15460174 (2004)
Levosimendan	FP	TP	24364085	N/A	TP	N/A	N/A	N/A	24364085 (2013)	15204232 (2004)	19101169 (2009)		*Coocurrence only
Edoxaban	TP	TP	N/A	DDA	TP	N/A	N/A	N/A	20934556 (2010)	20170841 (2010)	20934556 (2010)
Platelet activating factor	FP	TP	17251670	N/A	TP	N/A	N/A	N/A	17251670 (2007)	17251670 (2007)	17251670 (2007)		Types of evaluation
Enoximone	FP	FP	N/A	N/A	TP	31702687	1719270	Congestive heart failure	N/A	15365919 (2004)	N/A		E1: Evaluation using DDA
Ivabradine	FP	TP	28262346	N/A	TP	N/A	N/A	N/A	26385957 (2015)	12718562 (2003)	25346368 (2015)		TP @20 =	6
Tolvaptan	FP	TP	31980932	N/A	TP	N/A	N/A	N/A	N/A	15102593 (2004)	31980932 (2020)		FP @20 =	14
Carvedilol	TP	TP	N/A	DDA	TP	N/A	N/A	N/A	11511429 (2001)	9139344 (1994)	11511429 (2001)		Precision @20 =	0.3
Fondaparinux	FP	TP	24752085	N/A	TP	N/A	N/A	N/A	25684570 (2015)	12673926 (2003)	19571765 (2009)
Ximelagatran	FP	TP	18574928	N/A	TP	N/A	N/A	N/A	12742279 (2003)	12020054 (2002)	12020054 (2002)		E2: E1 and A-C literature evidence
Dofetilide	TP	TP	N/A	DDA	TP	N/A	N/A	N/A	7628887 (1995)	1279316 (1992)	1279316 (1992)		TP @20 =	17
Apixaban	TP	TP	N/A	DDA	TP	N/A	N/A	N/A	20211292 (2010)	17701479 (2007)	18096568 (2008)		FP @20 =	3
Flecainide	TP	TP	N/A	DDA	TP	N/A	N/A	N/A	3529911 (1986)	94620 (1979)	94620 (1979)		Precision @20 =	0.85
Eplerenone	FP	TP	29216985	N/A	TP	N/A	N/A	N/A	22538330 (2012)	16627524 (2006)	20388187 (2010)
Dabigatran													E3: E1, E2 and A-B-C literature evidence
Vitamin K antagonists													TP @20 =	18
Loop diuretics													FP @20 =	2
Aconitine													Precision @20 =	0.9
Propafenone
Rivaroxaban													TP (all predictions) =	65
Dabigatran etexilate													FN (all predictions) =	5
Bisoprolol													Recall (all predictions) =	0.9286
Mexiletine hydrochloride
Sotalol
Milrinone
Entecavir
Disopyramide
Telbivudine
Amiodarone
Antidiuretic Hormone Receptor Antagonists
ACE inhibitors
Ajmaline
Valsarran
Antithrombotic Agent
Direct Antithrombins
Alteplase, recombinant
Digoxin
Angiotensin 2 Receptor Blocker
Esmolol
Ruxolitinib
Spironolactone
clopidogrel
Beta-Adrenergic Blocking Agent
Diuretics
Antithrombic Drugs
Ticagrelor
Enzyme Antagonist
Warfarin
Adefovir
Defibrinotide
Enalaprilat
Dobutamine
Ticlopidine
Acepromazine
Candesartan
Isosorbide
Lisinopril
Agents, Anticoagulant
vinyl chloride
Quinidine
Vitamin K
antigen E
Hydralazine
Metoprolol
Aldosterone
Agents, Vasodilator
Angiotensin II
Phosphocreatine
Loratadine
Iobenguane
Heparin
Dexmedetomidine
HMG-CoA reductase inhibitor
Agents, Antihypertensive
Acetylcysteine
Antithrombin III
Losartan
Tranhexamic Acid
Choline glycerophosphate
Protein S human
Activated protein C
Procainamide
Tomato
Ryanodine
Glycerol trinitrate
Methylene Chloride
Dipyridamole
Calcium channel blocking agents
Atropine
Hyoscyamine
Chlorpromazine
Abacavir
Hydroxyurea
Chloralose
Leukotriene B4
Verapamil
Lidocaine
Birth contraceptive control pills
Tenofovir disoproxil
Phosphorylcholine
Atenolol
Propranolol
Blood-coagulation factor II
Vitamin J
Isoproterenol
Creatine
Gadolinium
Hepatitis B antigen
Blood coagulation factors
Hemostatic agents
Agents, Vasoconstrictor
Creatinine
Darbepoetin alfa
Catecholamines
Clonidine
Halothane
Progestogens
Blood Coagulation Factor VII
Ethylurethan
Oubain
Vasopressin
Diphenhydramine
CD142 Antigens
Cyclophosphamide
Noradrenaline
Streptozocin
Furosemide
Cholesterol
Potassium
Inositol
Doxorubicin
Propofol
Bupivacaine
Fentanyl citrate
Blood coagulation factor VIII
Alprazolam
Pentobarbital
Magnesium
Magnesium
Chlordiazepoxide
Amphetamine
Dioxygen
Blood Coagulation Factor I
Brown rice
Arachidonic Acid
Oxyphenbutazone
Sulphonamide
Brompheniramine maleate
2-Aminoglutaramic acid
Atomic helium
Nitric oxide
Calcium
Quilostigmine
Histidine
Adenosine
Adofen
Epinephrine
Histamine
2-Aminosuccinic acid
Aminolevulinic Acid
Element K
L-Carnitine
Isococaine
Indapamide
Sodium Nitroprusside
Diltiazem
Ionophores
Fatty Acids, Omega-3
Anhydrous dextrose
Prasugrel
Hexachlorophene
Terfenadine
Iodide I-123
Phosphodiesterase Antagonists
L-Methionine
Agents, Sympathomimetic
Moricizine
Phosphorus
Perindopril
ibutilide
Bretylium Tosilate
Levonorgestrel
Cardiac glycosides
Baby Aspirin
Tinzaparin
Pimobendan
Chlorothiazide
Ramipril
Prostaglandin E2
Acenocoumarol
Midazolam
Lactic acid
Prazosin hydrochloride
Thiazolidinedione
Desogestrel
Remifentanil
Dexfenfluramine
Fenfluramine
Dronedarone
Apri
Nadroparin
Antivirals
Nifedipine
Factor VIII-von Willebrand Factor
cilostazol
Gestodene
Bevacizumab
Tocainide
Estradiol
Ranolazine
Interferon alfa-n3
Nebivolol
Antipsychotic Drugs
Leukotriene C4
phenylmethylpyrazolone
Ether
Ranitidine
Naloxone
Hexamethonium
Raloxifene Hydrochloride
Date allergenic extract
Bucindolol
Amlodipine
Cisapride
Phentolamine
Methadone hydrochloride
empagliflozin
Prostaglandins
Agents, Tricyclic Antidepressive
Ephedrine
Interferon Alfa-2a, Recombinant
Lactobacillus plantarum
CaI-PLA(2)
Heparin group antithrombotic drugs
Plasmin Inhibitors
Anagrelide
Leukotriene D4
Sildenafil
Aprindine
Yohimbine
Clofibrate
Anaesthetic local
tamoxifen
Recombinant human relaxin
Acetic acid
Idraparinux
Thienopyridine Derivatives
Landiolol
Argatroban
torsemide
astemizole
Basiliximab
Pergolide
Salbutamol
Lenalidomide
Thiopental
Epoprostenol
Alcohol, Dehydrated
Irbesartan
Xamoterol
Glycopyrrolate
cabergoline
Streptokinase
800 Sodium Bicarbonate Powder
Acetylcholine
Betrixaban
Anticholinergic Agents
Triglycerides
Lovastatin
Adenosine Triphosphate
Abciximab
Succinylcholine
Labetalol
Busulphane
Selective estrogen receptor modulators
Blood coagulation factor IX
Agents, Antiinflammatory
Myristate Acetate, Phorbol
Ketamine
pegylated interferon alfa-2a
Vesnarinone
Botulinum Toxin A
Razoxane
Desmoteplase
Phentermine
Dihydropyridines

## Sheet: Bipolar_disorder
Drug (C)	DDA (E1)	DDA + Manual annotation (A-C) (E2)			DDA + Manual annotation (A-C / A-B-C) (E3)				First Clinical Trial - PMID (Year)	First co-occurrence of A and C in PubMed - PMID (Year)	First literature indicating the usefulness of C for A - PMID (Year)
		Evaluation metric	Literature evidence (PMID)	Other evidence	Annotation	Literature evidence (A-B)	Literature evidence (B-C)	Phenotype (B)
Cut-off date for SKiM execution: March 2019
Bipolar disorder
Anti-dementia Drugs	FP	FP	N/A	N/A	TP	31954065	29213743	Dementia	N/A	N/A	N/A		Color coding:
Paliperidone palmitate	FP	TP	26366967	N/A	TP	N/A	N/A	N/A	20565430 (2010)	17343660 (2007)	20565430 (2010)		DDA
Atomoxetine	FP	TP	16379520	N/A	TP	N/A	N/A	N/A	19877979 (2009)	16222910 (2005)	16379520 (2005)		Manual curation - A-C
Alosetron	FP	FP	N/A	N/A	FP	29105003	N/A	Irritability	N/A	N/A	N/A		Manual curation - A-B-C
Vortioxetine	FP	TP	28651185	N/A	TP	N/A	N/A	N/A	30826492 (2019)	26994277 (2016)	28651185 (2017)
Dimesylate, Lis-dexamfetamine	FP	TP	24014142	N/A	TP	N/A	N/A	N/A	24014142 (2013)	22263621 (2012)	24014142 (2013)		Types of evaluation
Antipsychotics	FP	TP	30770235	N/A	TP	N/A	N/A	N/A	4919888 (1970)	14881840 (1951)	14881840 (1951)		E1: Evaluation using DDA
Linaclotide	FP	FP	N/A	N/A	FP	29105003	N/A	Irritability	N/A	N/A	N/A		TP @20 =	3
Acamprosate	FP	TP	25514151	N/A	TP	N/A	N/A	N/A	22329472 (2012)	16573580 (2006)	17156154 (2006)		FP @20 =	17
Antidepressants	FP	TP	32015724	N/A	TP	N/A	N/A	N/A	4882229 (1968)	13817092 (1959)	13817092 (1959)		Precision @20 =	0.15
Paliperidone	TP	TP	N/A	DDA	TP	N/A	N/A	N/A	20565430 (2010)	17136449 (2007)	17343660 (2007)
Agomelatine	FP	TP	23430979	N/A	TP	N/A	N/A	N/A	17845278 (2007)	16225556 (2005)	17845278 (2007)		E2: E1 and A-C literature evidence
Ramelteon	FP	TP	20861739	N/A	TP	N/A	N/A	N/A	20861739 (2011)	20701978 (2011)	20861739 (2011)		TP @20 =	15
Amisulpride	FP	TP	25788497	N/A	TP	N/A	N/A	N/A	15738862 (2004)	2880542 (1986)	15889942 (2005)		FP @20 =	5
Agents, Antidepressive	FP	TP	32015724	N/A	TP	N/A	N/A	N/A	4882229 (1968)	13817092 (1959)	13817092 (1959)		Precision @20 =	0.75
Tegaserod	FP	FP	N/A	N/A	FP	29105003	N/A	Irritability	N/A	N/A	N/A
Venlafaxine	FP	TP	26892848	N/A	TP	N/A	N/A	N/A	9790160 (1998)	9790160 (1998)	9790160 (1998)		E3: E1, E2 and A-B-C literature evidence
Ziprasidone	TP	TP	N/A	DDA	TP	N/A	N/A	N/A	12668364 (2003)	11018226 (2000)	11018226 (2000)		TP @20 =	17
Sertindole	FP	FP	N/A	N/A	TP	19150704	25830594	Schizophrenia	N/A	N/A	N/A		FP @20 =	3
Risperidone	TP	TP	N/A	DDA	TP	N/A	N/A	N/A	7545159 (1995)	7520110 (1994)	7520110 (1994)		Precision @20 =	0.85
Sertraline
5 Hydroxytryptamine Uptake Inhibitors													TP (all predictions) =	81
mirtazapine													FN (all predictions) =	5
olanzapine													Recall (all predictions) =	0.9419
Escitalopram
Clozapine
nefazodone
Duloxetine
Rivastigmine
Moclobemide
Betahistine
(+)-fluoxetine
(−)-fluoxetine
Paroxetine
Antipsychotic Drugs
reboxetine
Anti-anxiety agents
Citalopram
Aripiprazole
Agents, Tricyclic Antidepressive
Nortriptyline
donepezil
Fluvoxamine
zopiclone
modafinil
Quetiapine Fumarate
Trazodone
Guanfacine
Memantine
Methylphenidate
Galantamine
Zolpidem
Ethopropazine
Bupropion
Monoamine Oxidase Inhibitor
Tolterodine
Clomipramine
Maprotiline
Lithium Carbonate
Phencyclidine
Rocuronium Bromide
Mianserin
Haloperidol
Cholinesterase Inhibitors
Rifamycin L 105SV
Fluphenazine
Antithrombotic Agent
Lamotrigine
Serotonin
Pregabalin
Naltrexone
Hyperici herba
Triazolam
Lorazepam
Agents, Antiepileptic
Insulin Glargine
Streptokinase
Ezetimibe
Bupivacaine
Alteplase, recombinant
Ketamine
Valproic acid
ACTH releasing factor
Diazepam
Artificial saliva
Agents, Antispasmodic
Oxybutynine
Amitriptyline
Methylprednisolone
Leptin
Brompheniramine maleate
Thiazolidinedione
Fentanyl citrate
Dipyridamole
Levodopa
Creatine
Analgesics opioid
Lithium
Agents, Anticonvulsive
Anticholinergic Agents
Anaesthetic local
17-deoxycortisol
Alcohol, Dehydrated
Hydrocortisone acetate
Melatonin
Lidocaine
Corticosteroids
Methylprednisolone Acetate
Levonorgestrel
Midazolam
Hydroxytryptamine
Prednisone
Alprazolam
Carbamazepine
Dexmedetomidine
Disulfiram
Halothane
Naloxone
Metformin
Noradrenaline
Adofen
Propofol
Gonadorelin
Agents, Immunosuppressive
Gabapentin
Analgesics
4-aminobutyric acid
Atomic helium
Nicotine
Acetaminophen
Morphine
Dopamine
Retinal
Ranitidine
Adrenocorticotropic Hormone
Glutamic acid
L-Methionine
Pilocarpine
Sulfonylurea Compounds
Hydroxyprogesterone
Sevoflurane
Apomorphine
HMG-CoA reductase inhibitor
Dexamethasone
Hexachlorophene
Birth contraceptive control pills
Gamma globulins
Date allergenic extract
Creatinine
Sumatriptan
Histidine
Nitric oxide
Anhydrous dextrose
Clonidine
Triglycerides
Cholesterol
Epinephrine
Quilostigmine
S-adenosylmethionine
Glucagon
Bovine casein
Somatropin
2-Aminosuccinic acid
Malathion
Amphetamine
Methyltestosterone
Chlordiazepoxide
Polysaccharides
Furosemide
Purified water
Chlorpromazine
Suvorexant
Milnacipran
Lurasidone
Zaleplon
Amiodarone
Tianeptine
Meprobamate
pioglitazone
Agents, Antiinflammatory
L-Tryptophan
Urea
Corn oil
rosiglitazone
Tacrine
Chickenpox vaccine
Flumazenil
Solifenacin
Insulin Detemir
Ropivacaine
Cyclosporine
Asenapine
Agents, Antihypertensive
Levetiracetam
Ginkgo biloba extract 761
Desvenlafaxine
Vitamin J
Oxytocin
Lithium salts
Phenelzine
Cloperastine Fendizoate
Acetylcysteine
Vecuronium
Nitrogen
Lomitapide
Cevimeline
Dopamine Agonists
Liraglutide
Nalmefene
Raclopride
Dipeptidyl-Peptidase 4 Inhibitors
Aspartame
Lactulose
Gentamycin
Chorionic gonadotropin
Antibiotics
Mipomersen
Levemir
Topiramate
Antirheumatic agent
Pentylenetetrazol
Perphenazine
Mecasermin
Flurazepam
Armodafinil
Sucrose
Azathioprine
Pyridoxine hydrochloride
Selenium
Lubiprostone
Amifostine
Acetylcholine
Megestrol acetate
Evolocumab
Androgen Analogs
Cholestyramine
Allopregnanolone
Oxidopamine
Adderall
galactose
exenatide
Pentobarbital
Bicucullin
Cephalexin
Thyroid
Flupenthixol
FG-7142
pramipexole
Cyclophosphamide
Temazepam
Allergens
Vilazodone
Methotrexate
Dioxygen
Alirocumab
ACE inhibitors
Isophane insulin
Inositol
Beta blockers
Interleukin 1 Receptor Antagonist
Streptozocin
Buprenorphine
zotepine
Tacrolimus
Pancreatin
norclozapine
Liothyronine
Pimavanserin
Medroxyprogesterone
Vigabatrine
Beta-Adrenergic Blocking Agent
Sodium valproate
Agents, Anticoagulant
Carbohydrates
Kynurenic Acid
Sitagliptin Phosphate
Thiopental
Atracurium
Simvastatin
Iodide I-123
Iloperidone
Clofibrate
Lactose
Cyanocobalamin
Meperidine
Alfentanil
Cariprazine
Antiparkinson Agents
8-Hydroxy-2-(di-n-propylamino)tetralin
L-tyrosine
Mivacurium
Acyclovir Sodium
Docosahexaenoic Acids
Alglucosidase Alfa
Methadone hydrochloride
Zuclopenthixol
Laxatives
Valerianae radix
Tranylcypromine
Angiotensin II
Hydroquinone
Isoflurane
Acetic acid
fluoxetine / olanzapine
Calcium channel blocking agents
ropinirole
vildagliptin
Thyroxine
Cannabinoids
Oxcarbazepine
2,3-butanediol
Cetirizine
Baclofen
Perampanel
Central Muscle Relaxant
Sulpiride
Pinaverium
loperamide
Sex Steroid Hormones
butadiene monoepoxide
Methotrimeprazine
Heroin
Diuretics
Remifentanil
Succinylcholine
Phosphorus
Peppermint oil
Isococaine
Lithium Chloride
Basiliximab
Loxapine
Darifenacin
Eluxadoline
Glycerol trinitrate
Kava
oseltamivir
Levomilnacipran
Peppermint allergenic extract
Folic acid
Lacosamide
Androgens
Crispin
Fesoterodine
Alkaline Phosphatase
Hypolipidemic Agents
Sufentanil
Gonadotropic Hormone
Aminolevulinic Acid
SCH-23390

## Sheet: Hypercholesterolemia
Drug (C)	DDA (E1)	DDA + Manual annotation (A-C) (E2)			DDA + Manual annotation (A-C / A-B-C) (E3)				First Clinical Trial - PMID (Year)	First co-occurrence of A and C in PubMed - PMID (Year)	First literature indicating the usefulness of C for A - PMID (Year)
		Evaluation metric	Literature evidence (PMID)	Other evidence	Annotation	Literature evidence (A-B)	Literature evidence (B-C)	Phenotype (B)
Cut-off date for SKiM execution: March 2019
Hypercholesterolemia
Cod liver oil	FP	TP	N/A	RxList (https://www.rxlist.com/cod_liver_oil/supplements.htm)	TP	N/A	N/A	N/A	N/A	14062664 (1963)	N/A		Color coding:
Extracts, liver	FP	FP	N/A	N/A	TP	28750643	19254467	Hepatic steatosis	N/A	849373 (1977)	N/A		Manual curation - A-C
Glucose injection	FP	FP	N/A	N/A	FP	N/A	N/A	N/A	N/A	348378 (1978)	N/A		Manual curation - A-B-C
Glucose-6-Phosphate	FP	FP	N/A	N/A	FP	N/A	N/A	N/A	N/A	6692904 (1984)	N/A		Diagnostic agent
isotonic sodium chloride	FP	FP	N/A	N/A	FP	N/A	N/A	N/A	N/A	184367 (1976)	N/A		Negative association
Glucose	FP	FP	N/A	N/A	FP	N/A	N/A	N/A	N/A	13977373 (1962)	N/A
2-NBDG	FP	FP	N/A	N/A	FP	N/A	N/A	N/A	N/A	N/A	N/A		Types of evaluation
T-0901317	FP	TP	18245819	N/A	TP	N/A	N/A	N/A	N/A	15522819 (2004)	18245819 (2008)		E1: Evaluation using DDA
3-O-Methylglucose	FP	FP	N/A	N/A	FP	N/A	N/A	N/A	N/A	N/A	N/A		TP @20 =	0
Lixisenatide	FP	FP	N/A	N/A	TP	31336553	32291880	Diabetes mellitus	N/A	N/A	N/A		FP @20 =	20
Dulaglutide	FP	FP	N/A	N/A	TP	31336553	31183384	Diabetes mellitus	N/A	N/A	N/A		Precision @20 =	0
Riociguat	FP	FP	N/A	N/A	TP	26062915	27263466	Hypertension	N/A	N/A	N/A
Apri	FP	FP	N/A	N/A	FP	N/A	N/A	N/A	N/A	N/A	N/A		E2: E1 and A-C literature evidence
Treprostinil	FP	FP	N/A	N/A	TP	26062915	31765604	Hypertension	N/A	N/A	N/A		TP @20 =	3
Semaglutide	FP	FP	N/A	N/A	TP	31336553	29688502	Diabetes mellitus	N/A	N/A	N/A		FP @20 =	17
Dapagliflozin	FP	TP	29572114	N/A	TP	N/A	N/A	N/A	N/A	29572114 (2018)	29572114 (2018)		Precision @20 =	0.15
Canagliflozin	FP	FP	N/A	N/A	TP	31336553	31167663	Diabetes mellitus	N/A	N/A	N/A
Gadoxetate / Primovist	FP	FP	N/A	N/A	TP	28750643	24339365	Hepatic steatosis	N/A	N/A	N/A		E3: E1, E2 and A-B-C literature evidence
Empagliflozin	FP	FP	N/A	N/A	TP	31336553	32020696	Diabetes mellitus	N/A	31784656 (2019)	N/A		TP @20 =	13
Ambrisentan	FP	FP	N/A	N/A	TP	26062915	18506008	Hypertension	N/A	N/A	N/A		FP @20 =	7
Deoxyglucose													Precision @20 =	0.65
saxagliptin
Alogliptin													TP (all predictions) =	65
vildagliptin													FN (all predictions) =	4
Dipeptidyl-Peptidase 4 Inhibitors													Recall (all predictions) =	0.8228
Sitagliptin Phosphate
Linagliptin
gadolinium chloride
Liraglutide
Meglitinide
Phlorhizin
Nateglinide
Chlorozotocin
benzphetamine
Agents, Antihypertensive
insulin-lispro
Insulin Degludec
Glimepiride
Levemir
Insulin Glargine
Zotarolimus
Isophane insulin
Gluconic Acid
Insulin Lispro
Insulin Detemir
5,6-Benzoflavone
Insulin Aspart
Silimarin
Desoxycorticosterone acetate
Hepatitis B Immune Globulin
Acarbose
Bosentan
Fructose
Paricalcitol
alpha glucosidase inhibitors
Ethylmorphine
Sulfonylurea Compounds
Repaglinide
4-hydroxynonenal
Amlodipine
exenatide
Sulfobromophthalein
orlistat
Renagel
Glucagon
Chlorzoxazone
Olmesartan
Pancreatic hormones
Peginesatide
Thiazolidinedione
Xylose
Nebivolol
Labetalol
Aliskiren
Tirofiban
Perindopril
Bilirubin
UDP-alpha-D-glucuronate
Chenodeoxycholic Acid
Metformin
Gliclazide
Aminophenazone
Streptozocin
Sibutramine
Abciximab
fructose 2,6-biphosphate
Eptifibatide
Febuxostat
Oxiglutatione
Renin-inhibitors
Turpentine gum
Apixaban
Adofen
Angiotensin 2 Receptor Blocker
Pima brand of potassium iodide
Irbesartan
Edoxaban
aristolochic acid
Bivalirudin
Lisinopril
Telmisartan
Entecavir
Carrageenan
Phosphoenolpyruvate
Dabigatran
Ritodrine
Direct acting antivirals
Methyprylon
D-(+)-maltose
Tempol
Ranolazine
acetovanillone
Oxonic Acid
Valsarran
Peritoneal dialysis fluid
Streptokinase
Oxidopamine
methylcholanthrene
Chlorotrianisene
Orotic acid
aflatoxin b1
Doxazosin
Tolbutamide
Antithrombotic Agent
Leptin
Ticagrelor
Orgotein
Enalaprilat
fructose 1,6-diphosphate
Isradipine
Dabigatran etexilate
galactose
Hydralazine
ACE inhibitors
Candesartan
Ergometrine
Regular Insulin, Human
Deoxycorticosterone
Cinacalcet
pioglitazone
Prasugrel
glucans
fructose 1,6 bisphosphate
Methyldopa
Cholic acid
antigen E
Tetrofosmin
Pokeweed
Sofosbuvir
Antioxidants
Triglycerides
Felodipine
Hepatitis B antigen
Rivaroxaban
Eplerenone
Diazoxide
Atenolol
Vitamin K antagonists
Losartan
Dipyridamole
Phentermine
Insulin Pork
Thienopyridine Derivatives
Imiquimod
rosiglitazone
Xylitol
Aldosterone
acadesine 5'-monophosphate
Adefovir
Ribavirin
Fludeoxyglucose F-18
Angiotensin II
Calcium channel blocking agents
Agents, Antiinflammatory
Benzbromarone
dextran sulfate
Fibrates
B cell growth factor 2
5-hydroxymethyl-2-furaldehyde
Latanoprost
clopidogrel
D-glucitol
Glutathione
Enzyme Antagonist
Diuretics
Corn oil
Alglucosidase Alfa
Glyburide
troglitazone
Peroxides
Aminolevulinic Acid
Dobutamine
D-Mannose
Gadopentetate dimeglumine
Chitosan
Sildenafil
Thyroxine
Xenobiotics
Biguanide antimalarial
Interleukin 1 Receptor Antagonist
decitabine
Acepromazine
Beta-Adrenergic Blocking Agent
calcipotriene
Tetrachlorodibenzodioxin
Ciloprost
3,4-dihydro-6-hydroxy-2,5,7,8-tetramethyl-2h-1-benzopyran-2- carboxylic acid
Gadolinium
Sestamibi
Iodide I-123
Cholestyramine
Trimetazidine
Dimercaprol
Thyroid hormones
mitogens
Adjuvant, Freund
Menadione / Vitamin K3
Buthionine sulfoximine
Isosorbide Mononitrate
Parathyroid Hormone
Leukotriene B4
L-Carnitine
Kainic acid
Sorafenib
Chlorothalidone
Alteplase, recombinant
Thioctic Acid
Agents, Vasodilator
Sodium sulfate
Nitrendipine
Isosorbide
Therapeutic Androstenedione
Probucol
Chlorothiazide
Factor VIII-von Willebrand Factor
Indocyanine green
Calcitriol
Rasburicase
Bromsulphalein
Somatropin
Creatinine
Ivabradine
Methylglyoxal
Spironolactone
Antithrombin III
Follicle-Stimulating Hormone
Abacavir
Hydrogen peroxide
Hepatitis A Vaccine
Cytochalasin B
Timolol
intralipid
Nicardipine
Carbohydrates
Ustekinumab
Thyroglobulin
Misoprostol
Sodium alginate
Gonadotropic Hormone
Selenium Sulfide
Azacitidine
Phosphocreatine
Chorionic gonadotropin
Adenosylmethionine
Calcidiol
Ticlopidine
Ferumoxides
sulforafan
Bromocriptine
Uric Acid
Antithrombic Drugs
Glucosamine
Alfa1 antitrypsin
Dihydronicotinamide adenine dinucleotide phosphate
Androgens
Lovastatin
Creatine
Hydrocortisone acetate
Lactose
Carvedilol
HMG-CoA reductase inhibitor
5-alpha Dihydrotestosterone
Dibenziodolium
Methyltestosterone
Warfarin
Mecasermin
Manitol
Metoprolol
Diazodicarboxylic Acid Bisdimethylamide
Liothyronine
Cellulase
Blood coagulation factor VIII
rimonabant
Everolimus
Betamethasone
Palmitinic acid
Hydroxypropylmethylcellulose
Agents, Vasoconstrictor
Epoprostenol
Dapsone
Starch
Polysorbate 80
Ramipril
Tacrolimus
Ezetimibe
Sucrose
Alkaline Phosphatase
B-Cell Activating Factor
4-Hydroxyproline
2,5-Diaminovaleric acid
Monoclonal Antibody OKT3
Gonadorelin
Ketoconazole
Diphenylpyraline
Adrenocorticotropic Hormone
Selenite
Tocopherols
Blood coagulation factors
Antigen antibody complex
Blood Coagulation Factor I
Activated protein C
Calcium Acetate
Sex Steroid Hormones
Calcineurin Antagonists
N-acetylglucosamine
Aminobenzene
Oxytocin
Rotenone
Glycerol trinitrate
Fish oil
Adrenergic alpha blockers
Clofibrate
Hypolipidemic Agents
Thyroid
Methacholine
Cox 2 inhibitor
Dihydropyridines
Cholesterol
Clostridiopeptidase A
2-ketoglutarate
Alginic acid
Interleukin-2
Acyclovir Sodium
Somatostatin
Bromodeoxyuridine
Deoxythymidine
Chlorhexidine
Darbepoetin alfa
cilostazol
2-Aminosuccinic acid
Monoclonal antibodies
Mucopolysaccharides
Interleukin-2 Fusion Protein
Recombinant Interleukin
Blood-coagulation factor II
Gamma globulins
Antivirals
Brain natriuretic peptide
Interferon Alfa-2a, Recombinant
Hydroxyprogesterone
Fibroblast Growth Factor 2
Fluorescein sodium
Vitamin D
Retinal
Electrolytes
Vitamin B7
Granulocyte-macrophage colony-stimulating factor
Iohexol
Loratadine
Antiserum
Budesonide
Meprobamate
CD142 Antigens
Enzymes
Succinic acid
Oleandomycin triacetate
Allopurinol
Polyethylene glycol
2,4-Dinitrophenol
Sodium Nitroprusside
Rosuvastatin Calcium
Epinephrine
Irinotecan
Glipizide
Mesalamine
Furosemide
Sumatriptan
Platelet-activating factor
Docosahexaenoic Acids
Vasopressin
Vitamin K
Alprazolam
Isoetharine
Coenzyme Q10
Prostaglandin E2
Alitretinoin
resveratrol
ferric oxide
Dexamethasone
Catecholamines
Itrizole
Phenobarbital
Lactic acid
Levonorgestrel
Folic acid
Estradiol
Celecoxib
Methyl cellulose
Antigens
Cyanocobalamin
Interferon alfa-n3
Olive oil
Prazosin hydrochloride
Interferon gamma-1b
Methanal
Vitamin J
Agents, Anticoagulant
Mycophenolate mofetil
Linoleic Acid
Capsaicine
Xanthine
Photosensitising agents
lycopene
2-Aminoglutaramic acid
Atomic helium
zirconium oxide
Organic acids
1-methyl-4-phenylpyridinium (MPP+)
Simvastatin
Glucocorticoids
Beta blockers
Oxaliplatin
Aspartame
Triclosan
Aminoethylsulfonic acid
Selenium
Polyphenols
Hexachlorophene
Diphenhydramine
Noradrenaline
Chlorpromazine
Calcium
Nitric oxide
Polysaccharide-K
Urea
Mycophenolate
Nifedipine
Diltiazem
Racemethionine
Uridine
Doxorubicin
Apomorphine
Wortmannin
Radioactive drug
Eicosapentaenoic Acid
Serum albumin
Levothyroxine
Potassium
Magnesium
Magnesium
Antirheumatic agent
Curcumin
Dextran
Clonidine
Leucovorin
Ammonia
Citric acid
Azathioprine
Chlordiazepoxide
L-Arginine
Inulin
Iodine-127
Fluorouracil
Fatty Acids, Omega-3
Nicotinamide adenine dinucleotide
Substance P
9-Octadecenoic Acid
S-adenosylmethionine
Phosphatidylethanolamine
Chickenpox vaccine
Choline Glycerophospholipids
Prostaglandins
Cyclophosphamide
Leucine
Pancreatin
Antibodies, Antineutrophil Cytoplasmic
Adenosine
epigallocatechin gallate
Methylprednisolone
Cyclosporine
Arachidonic Acid
Agents, Immunosuppressive
Etanercept
Quilostigmine
Prostaglandin E1alpha
Brompheniramine maleate
Quercetin
Corticosteroids
Methylprednisolone Acetate
Niacin
Bupivacaine
Green Tea
Histidine
L-tyrosine
Propranolol
Acetylcysteine
Saccharomyces cerevisiae allergenic extract
Phosphates
Biphosphonate
Paclitaxel
Immunoadjuvants
Protein A
Dioxygen
Butyricum acidum, butyric acid, Homeopathic preparation
Adenosine Triphosphate
Cyclic AMP
Sodium lauryl sulfate
Deferoxamine mesylate
Alcohol, Dehydrated
Diclofenac
Sphingosine
Allergens
Polysaccharides
beta Carotene
Dopamine
Sirolimus
Mesenchymal Stem Cells
Contrast Media
Cellulose
6-Aminopurine
Prednisone
Chelating Agents
Acetaminophen
Vaccines
Hyaluronic acid
Catechin
Candida albicans antigen
arsenic trioxide
Androgen Analogs
Bovine casein
Vitamins
Manganese
beta-D-Galactosidase
Ascorbic Acid
Melatonin
Inositol
Isococaine
Cardiac glycosides
Agents, Anticancer
Element K
Copper-63
Carotenoids
Verapamil
Gelatin
Carbonyl iron
17-deoxycortisol
Calcium Homeostasis
Formic Acid
Antagonists, Protease
Myristate Acetate, Phorbol
Indapamide
Histamine
Adenosine monophosphate
Amiodarone
Activated charcoal
Bevacizumab
Glutamic acid
Cephalexin
Acetic acid
Zinc
800 Sodium Bicarbonate Powder
Carbocysteine
Naproxen
Morphine
Sodium choride
L-Methionine
Nitrogen
Birth contraceptive control pills
Heparin
Silica
Ranitidine
Date allergenic extract
2,6-diaminohexanoic acid
Phosphorus
Oxyphenbutazone
L-threonine
Fluoride
Tricalcium phosphate
2-aminoacetic acid
Amphetamine
L-serine
Isoproterenol
Acetylcholine
Hypoxanthine
Antibiotics
Purified water
Medical air
Antipsychotic Drugs
Pindolol
Lorcaserin
Lanthanum carbonate
Mineralocorticoids
Mephenytoin
Pentetic acid
Quinolinic Acid
Propidium
Sodium Selenite
Deoxycholic Acid
Cilazapril
1 Sar 8 Ala Angiotensin II / Saralasin
Defibrinotide
Hemostatic agents
Estrogens
Urokinase
Basiliximab
Bleomycine
Grape
Octreotide acetate
Minoxidil
Appetite Depressants
Grape seed
Pregnenolone 16 alpha Carbonitrile
Antileukotrienes
Vitamin D3
Valine
Trandolapril
Sodium chloride
Aldosterone antagonists
Pancreozymin
Quinapril
Cremophor EL
Ozone
Bezafibrate
Soybean oil
Oubain
dichloroacetic acid
Dextrine
Agents, Sympathomimetic
Protein S human
Lauryl Sulfate
Fluticasone
Bendroflumethiazide
Difluorostannylene
Phytosteroids
Polyinosinic acid:polycytidylic acid
Dexfenfluramine

## Sheet: CHD
Drug (C)	DDA (E1)	DDA + Manual annotation (A-C) (E2)			DDA + Manual annotation (A-C / A-B-C) (E3)				First Clinical Trial - PMID (Year)	First co-occurrence of A and C in PubMed - PMID (Year)	First literature indicating the usefulness of C for A - PMID (Year)
		Evaluation metric	Literature evidence (PMID)	Other evidence	Annotation	Literature evidence (A-B)	Literature evidence (B-C)	Phenotype (B)
Cut-off date for SKiM execution: March 2019
Coronary heart disease (CHD)
Influenza vaccine	FP	TP	31813664	N/A	TP	N/A	N/A	N/A	N/A	11120692 (2000)	11120692 (2000)		Color coding:
Peramivir	FP	FP	N/A	N/A	TP	15061620	28540991	Influenza	N/A	N/A	N/A		Manual curation - A-C
Neuraminidase inhibitors	FP	FP	N/A	N/A	TP	15061620	28961794	Influenza	N/A	24524404 (2014)	N/A		Manual curation - A-B-C
Aclidinium	FP	FP	N/A	N/A	TP	30335000	25539654	Dyspnea	N/A	N/A	N/A		Negative association
Zanamavir	FP	FP	N/A	N/A	TP	15061620	31619209	Influenza	N/A	N/A	N/A		May be a positive association
Riociguat	FP	FP	N/A	N/A	TP	16075651	30956210	Obstructive lung disease	N/A	N/A	N/A
Oseltamivir	FP	FP	N/A	N/A	TP	15061620	30797703	Influenza	N/A	24524404 (2014)	N/A		Types of evaluation
Vernakalant	FP	FP	N/A	N/A	TP	32051552	18927241	Arrhythmia	N/A	N/A	N/A		E1: Evaluation using DDA
Alectinib	FP	FP	N/A	N/A	TP	32216792	27516885	Lung disease	N/A	N/A	N/A		TP @20 =	0
Treprostinil	FP	FP	N/A	N/A	TP	32216792	29275453	Lung disease	N/A	N/A	N/A		FP @20 =	20
Indacaterol	FP	FP	N/A	N/A	TP	16075651	29084188	Obstructive lung disease	N/A	N/A	N/A		Precision @20 =	0
Ceritinib	FP	FP	N/A	N/A	FP	32216792	31019956	Lung disease	N/A	N/A	N/A
Osimertinib	FP	FP	N/A	N/A	??	32216792	31371992	Lung disease	N/A	N/A	N/A		E2: E1 and A-C literature evidence
Rimantadine	FP	FP	N/A	N/A	TP	15061620	16286056	Influenza	N/A	N/A	N/A		TP @20 =	1
Sacubitril	FP	FP	N/A	N/A	TP	27339795	30536595	Hypertension	N/A	N/A	N/A		FP @20 =	19
Carbon-13 urea	FP	FP	N/A	N/A	FP	N/A	N/A	N/A	N/A	N/A	N/A		Precision @20 =	0.05
Agents, Antiasthmatic	FP	FP	N/A	N/A	TP	28433577	1634449	Asthma	N/A	N/A	N/A
Tiotropium	FP	FP	N/A	N/A	TP	28433577	31495432	Asthma	N/A	N/A	N/A		E3: E1, E2 and A-B-C literature evidence
Crizotinib	FP	FP	N/A	N/A	FP	32216792	30946796	Lung disease	N/A	N/A	N/A		TP @20 =	16
Ambrisentan	FP	FP	N/A	N/A	TP	27339795	18506008	Hypertension	N/A	N/A	N/A		FP @20 =	3
													Precision @20 =	0.8
None of new drugs achieve distinct prediction score for coronary heart disease (see DDAs vs. new drugs for CHD in Supplementary Figure 4). Therefore, we listed only top 20 hits with manual annotation.													TP (all predictions) =	42
													FN (all predictions) =	8
													Recall (all predictions) =	0.84

## Sheet: Graves_disease
Drug (C)	DDA (E1)	DDA + Manual annotation (A-C) (E2)			DDA + Manual annotation (A-C / A-B-C) (E3)				First Clinical Trial - PMID (Year)	First co-occurrence of A and C in PubMed - PMID (Year)	First literature indicating the usefulness of C for A - PMID (Year)
		Evaluation metric	Literature evidence (PMID)	Other evidence	Annotation	Literature evidence (A-B)	Literature evidence (B-C)	Phenotype (B)
Cut-off date for SKiM execution: March 2019
Grave's disease
Agents thyroid	FP	TP	19889263	N/A	TP	N/A	N/A	N/A	N/A	27407340 (2001)	19889263 (2009)		Color coding:
Pig thyroid	FP	FP	N/A	N/A	FP	29950539	2903804*	Hyperthyroidism	N/A	6123540 (1982)	N/A		Manual curation - A-C
Thyroid Therapy	FP	FP	N/A	N/A	FP	10197268	7305197*	Thyroid dysfunction	N/A	N/A	N/A		Manual curation - A-B-C
Thyroid	FP	FP	N/A	N/A	FP	N/A	N/A	N/A	N/A	N/A	N/A		May be a positive association
Thyroid hormones	FP	FP	17127140	N/A	FP	N/A	N/A	N/A	N/A	7010274 (1981)	N/A		Negative association
Isotonic sodium chloride	FP	FP	N/A	N/A	FP	31016148	1685705*	Diabetes mellitus	N/A	N/A	N/A
Parathyroid Hormone	FP	FP	N/A	N/A	??	12471001	31116878	Hypoparathyroidism	N/A	23776907 (2013)	N/A		Types of evaluation
Belimumab	FP	FP	N/A	N/A	TP	19143167	30762205	Myasthenia gravis	N/A	N/A	N/A		E1: Evaluation using DDA
SB-269970	FP	FP	N/A	N/A	FP	31354636	N/A	Hashimoto thyroiditis	N/A	N/A	N/A		TP @20 =	0
Thyroglobulin	FP	TP	17550957	N/A	TP	N/A	N/A	N/A	N/A	1172762 (1975)	N/A		FP @20 =	20
Iodine therapy	FP	FP	N/A	N/A	TP	29950539	26492542	Hyperthyroidism	N/A	222864 (1979)	N/A		Precision @20 =	0
Alpha-methylserotonin	FP	FP	N/A	N/A	FP	31354636	N/A	Hashimoto thyroiditis	N/A	N/A	N/A
Iodine I-131	FP	FP	N/A	N/A	TP	29950539	28436636	Hyperthyroidism	N/A	3840840 (1985)	N/A		E2: E1 and A-C literature evidence
5-carboxamide tryptamine	FP	FP	N/A	N/A	FP	31354636	N/A	Hashimoto thyroiditis	N/A	N/A	N/A		TP @20 =	2
GR-113808	FP	FP	N/A	N/A	FP	31354636	N/A	Hashimoto thyroiditis	N/A	N/A	N/A		FP @20 =	18
Reverse triiodothyronine	FP	FP	N/A	N/A	TP	29950539	476982	Hyperthyroidism	N/A	N/A	N/A		Precision @20 =	0.1
MDL-100907	FP	FP	N/A	N/A	FP	31354636	N/A	Hashimoto thyroiditis	N/A	N/A	N/A
Mesulergine	FP	FP	N/A	N/A	FP	31354636	N/A	Hashimoto thyroiditis	N/A	N/A	N/A		E3: E1, E2 and A-B-C literature evidence
Methiothepin	FP	FP	N/A	N/A	FP	31354636	N/A	Hashimoto thyroiditis	N/A	N/A	N/A		TP @20 =	6
Corticorelin ovine triflutate	FP	FP	N/A	N/A	FP	10771809*	N/A	Pituitary disease	N/A	N/A	N/A		FP @20 =	13
Antibodies, Antineutrophil Cytoplasmic													Precision @20 =	0.3
8-Hydroxy-2-(di-n-propylamino)tetralin
4-iodo-2,5-dimethoxyphenylisopropylamine													TP (all predictions) =	9
Tiratricol													FN (all predictions) =	0
Antithyroid Agents													Recall (all predictions) =	1
Cinacalcet
Thyroxine
Oleandomycin triacetate
1-(m-trifluoromethylphenyl)piperazine
Ritanserin
Hypothalamic hormones
Canagliflozin
Methimazole
Lenvatinib
Ipsapirone
1-(3-chlorophenyl)piperazine
Sodium iodide
Propylthiouracil
Metergoline
Ketanserin
Quipazine
Hydroxytryptamine
Dapagliflozin
empagliflozin
Paricalcitol
Carbimazole
ACTH releasing factor
Liothyronine
Dipeptidyl-Peptidase 4 Inhibitors
Tropisetron
vildagliptin
insulin-lispro
5-hydroxytryptamine antagonists
Methysergide
Dimethyltryptamine
Serotonin
cabergoline
Edrophonium Chloride
Glimepiride
Sitagliptin Phosphate
Insulin Lispro
Isophane insulin
Pokeweed
Insulin Aspart
Insulin Glargine
5-Hydroxytryptophan
Adrenocorticotropic Hormone
Follicle-Stimulating Hormone
Sestamibi
Sulfonylurea Compounds
vandetanib
Gonadorelin
alpha glucosidase inhibitors
Bromocriptine
Buserelin
Liraglutide
Renagel
Iodine-127
Metformin
Streptozocin
decitabine
Pima brand of potassium iodide
5-Methoxytryptamine
Thiazolidinedione
Acarbose
Gonadotropic Hormone
Gliclazide
Somatropin
adrenocorticotropic hormone 1-24
Granisetron
Iodide I-123
Fenfluramine
Pyridostigmine bromide
mitogens
Mianserin
17-deoxycortisol
exenatide
Metapyrone
Ethopropazine
Therapeutic Androstenedione
Factor VIII-von Willebrand Factor
Calcitriol
Dexfenfluramine
Calcidiol
Antithrombin III
Biguanide antimalarial
vitamin A2
Azacitidine
Phosphocreatine
Potassium Iodide
Aldosterone
Chorionic gonadotropin
Rocuronium Bromide
Creatinine
Hydrocortisone acetate
Ondansetron
Androgens
Levothyroxine
Citalopram
Creatine
pioglitazone
5-alpha Dihydrotestosterone
Methyltestosterone
Dobutamine
Mecasermin
Gonadotropin-Releasing Hormone Agonist
Spiperone
Emtricitabine
Blood coagulation factor VIII
Cyproheptadine
Alfa1 antitrypsin
Bilirubin
Pindolol
Regular Insulin, Human
Calcium D-gluconate
4-Hydroxyproline
Monoclonal Antibody OKT3
Glucagon
Blood coagulation factors
Antigen antibody complex
Dipyridamole
Alkaline Phosphatase
Blood Coagulation Factor I
Activated protein C
Sex Steroid Hormones
alfacalcidol
Leptin
(+)-fluoxetine
(−)-fluoxetine
Escitalopram
Triglycerides
Clostridiopeptidase A
Paroxetine
Epinephrine
Pargylin
Antithrombotic Agent
Estradiol benzoate
Interleukin-2
Somatostatin
Bromodeoxyuridine
Deoxythymidine
Darbepoetin alfa
Glucose-6-Phosphate
Anhydrous dextrose
Monoclonal antibodies
rosiglitazone
Mucopolysaccharides
Interleukin-2 Fusion Protein
artificial tear
Blood-coagulation factor II
Gamma globulins
Deoxyglucose
Hydroxyprogesterone
Fibroblast Growth Factor 2
Fluorescein sodium
Vitamin D
Retinal
Oral Poliovirus Vaccine
Electrolytes
Vitamin B7
Granulocyte-macrophage colony-stimulating factor
Other hormones
Antiserum
Botulinum Toxin A
Meprobamate
CD142 Antigens
Ipilimumab
Calcium Homeostasis
Fluvoxamine
Furosemide
Sumatriptan
Docosahexaenoic Acids
Vasopressin
Dopamine Agonists
Glyburide
Gadolinium
Alprazolam
Isoetharine
Methyprylon
Alitretinoin
Aminolevulinic Acid
Dexamethasone
Catecholamines
B-Cell Activating Factor
Phenobarbital
Levonorgestrel
Folic acid
Abatacept
Cholesterol
Antigens
Agents, Vasodilator
Cyanocobalamin
Interferon gamma-1b
Methanal
Vitamin J
Octreotide acetate
Agents, Antiepileptic
Angiotensin II
Atomic helium
Orgotein
Streptokinase
Glucocorticoids
Aspartame
Prostaglandin E2
Selenium
5 Hydroxytryptamine Uptake Inhibitors
Hexachlorophene
Noradrenaline
Chlorpromazine
Bupropion
Calcium
Nitric oxide
Polysaccharide-K
Urea
Vitamin D3
Bupivacaine
Alteplase, recombinant
Gastrin Pentapeptide
Serum albumin
Potassium
Lysergamid
Magnesium
Magnesium
Leucovorin
Mycophenolate mofetil
Chlordiazepoxide
L-Arginine
Amiodarone
Glutathione
Adofen
S-adenosylmethionine
Methylenedioxymethamphetamine
Cyclophosphamide
Leucine
Adenosine
2-Aminosuccinic acid
Clomiphene
Quilostigmine
Brompheniramine maleate
Histidine
L-tyrosine
Mycophenolate
Piperazine
Agents, Anticoagulant
Protein A
Desmopressin
Dioxygen
Cyclic AMP
Sodium lauryl sulfate
Clomipramine
Enzymes
Methylprednisolone
Monoamine Oxidase Inhibitor
Angiotensin 2 Receptor Blocker
Dopamine
Oxytocin
Yohimbine
Nandrolone
Levodopa
Phosphorus
Lornoxicam
Ascorbic Acid
Isococaine
Fentanyl citrate
Mifepristone
Azathioprine
Element K
Hydroxychloroquine
Agents, Anticonvulsive
Adenosine monophosphate
Anaesthetic local
Prazosin hydrochloride
Tricalcium phosphate
Melatonin
Androgen Analogs
Cholinesterase Inhibitors
Lidocaine
Corticosteroids
ACE inhibitors
Methylprednisolone Acetate
HMG-CoA reductase inhibitor
Prednisone
Agents, Immunosuppressive
Biphosphonate
Agents, Antidepressive
Antipsychotic Drugs
calcium and magnesium
Agents, Antihypertensive
Zimelidine
Anti-anxiety agents
Calcium carbonate
Adjuvant, Freund
Forskolin
Eye drops brand of Tetrahydrozoline
Agents, Tricyclic Antidepressive
Interferons
Daunorubicin
Clozapine
Acetylcholine
Acetaminophen
Enzyme Antagonist
Acepromazine
Heparin
Oxidopamine
Protein S human
Reserpine
Estrogens
Haloperidol
Clofibrate
Ranitidine
Immunoadjuvants
Chickenpox vaccine
L-Tryptophan
Agents, Antimalarial
Naloxone
Tetrodotoxin
Apomorphine
Clonidine
Date allergenic extract
Diuretics
Substance P
L-Methionine
Glutamic acid
Indole
4-aminobutyric acid
Agents, Vasoconstrictor
Interferon alfa-n3
Propranolol
Hyoscyamine
Atropine
Cyclosporine
Skeleton
Agents, Antiinflammatory
Histamine
Methotrexate
Basiliximab
Acetic acid
Sorafenib
saxagliptin
L-Carnitine
Prostigmine
Denosumab
Insulin Detemir
Hyaluronic acid
Hemostatic agents
alendronate sodium
Methacholine
Racemethionine
Beta-Adrenergic Blocking Agent
2-Aminoglutaramic acid
Prostaglandins
Isoproterenol
Baclofen
Vaccines
Tacrolimus
Valproic acid
Fludeoxyglucose F-18
Diethylstilbestrol
L-serine
Clorgiline
800 Sodium Bicarbonate Powder
Guanosine 5'-(3-O-Thio)Triphosphate
Hydralazine
Fluoride ion
Calcium channel blocking agents
Ropivacaine
Amphetamine
Acetylcysteine
Cinanserin
Alglucosidase Alfa
Cabozantinib
Hypolipidemic Agents
Vecuronium
Antibiotics
Agents, Anticancer
Mechlorethamine
Chlorpropamide
Pancreatin
troglitazone
Agglutinin
Maxacalcitol
2-phenethylamine
SCH-23390
Linagliptin
Succinylcholine
Iobenguane
Progestogens
Pancuronium bromide
Pamidronate
Lovastatin
Tolbutamide
Barium
Myristate Acetate, Phorbol
Estrone
Carbonyl iron
Poliovirus Vaccines
Alcohol, Dehydrated
Testosterone propionate
Secretin
Levetiracetam

## Sheet: Myocardial_infarction
Drug (C)	DDA (E1)	DDA + Manual annotation (A-C) (E2)			DDA + Manual annotation (A-C / A-B-C) (E3)				First Clinical Trial - PMID (Year)	First co-occurrence of A and C in PubMed - PMID (Year)	First literature indicating the usefulness of C for A - PMID (Year)
		Evaluation metric	Literature evidence (PMID)	Other evidence	Annotation	Literature evidence (A-B)	Literature evidence (B-C)	Phenotype (B)
Cut-off date for SKiM execution: March 2019
Myocardial infarction
Sacubitril	FP	TP	30963101	N/A	TP	N/A	N/A	N/A	N/A	25362207 (2015)	25362207 (2015)		Color coding:
Encainide	FP	TP	6778194	N/A	TP	N/A	N/A	N/A	2473403 (1989)	6778194 (1980)	6778194 (1980)		DDA
Aldosterone antagonists	FP	TP	24093851	N/A	TP	N/A	N/A	N/A	17700397 (2007)	10695491 (1999)	12673184 (2003)		Manual curation - A-C
Nesiritide	FP	TP	20339970	N/A	TP	N/A	N/A	N/A	20339970 (2010)	11757793 (2001)	15545516 (2004)		May be a positive association
Levosimendan	TP	TP	N/A	DDA	TP	N/A	N/A	N/A	12208222 (2002)	10624967 (2000)	10624967 (2000)		Negative association
Ergometrine Maleate	FP	FP	N/A	N/A	FP	N/A	N/A	N/A	N/A	6336853 (1983)	N/A
Enoximone	FP	TP	8508864	N/A	TP	N/A	N/A	N/A	8508864 (1993)	2978498 (1988)	8508864 (1993)		Types of evaluation
Ivabradine	TP	TP	N/A	DDA	TP	N/A	N/A	N/A	22416440 (2011)	15648303 (2004)	16644235 (2006)		E1: Evaluation using DDA
Tolvaptan	FP	TP	28423233	N/A	TP	N/A	N/A	N/A	N/A	15102593 (2004)	22984091 (2012)		TP @20 =	7
Carvedilol	TP	TP	N/A	DDA	TP	N/A	N/A	N/A	9236433 (1997)	2573213 (1989)	2573214 (1989)		FP @20 =	13
Dofetilide	TP	TP	N/A	DDA	TP	N/A	N/A	N/A	9259163 (1997)	1988663 (1991)	1988663 (1991)		Precision @20 =	0.35
Apixaban	FP	FP	22801398	N/A	FP	N/A	N/A	N/A	N/A	19470889 (2009)	N/A
Flecainide	TP	TP	N/A	DDA	TP	N/A	N/A	N/A	2473403 (1989)	7222906 (1981)	7222906 (1981)		E2: E1 and A-C literature evidence
Edoxaban	FP	TP	30092658	N/A	TP	N/A	N/A	N/A	N/A	20934556 (2010)	30092658 (2018)		TP @20 =	15
Eplerenone	TP	TP	N/A	DDA	TP	N/A	N/A	N/A	12668699 (2003)	11454568 (2001)	11504167 (2001)		FP @20 =	5
Dabigatran	FP	FP	30219540	N/A	FP	N/A	N/A	N/A	N/A	19926603 (2009)	N/A		Precision @20 =	0.75
Ranolazine	TP	TP	N/A	DDA	TP	N/A	N/A	N/A	22709755 (2013)	7873471 (1994)	11334871 (2001)
Diuretics, Loop	FP	TP	8011561	N/A	TP	N/A	N/A	N/A	N/A	3890392 (1985)	8011561 (1993)		E3: E1, E2 and A-B-C literature evidence
Aconitine	FP	FP	20937638	N/A	FP	N/A	N/A	N/A	N/A	6803699 (1981)	N/A		TP @20 =	15
Propafenone	FP	TP	629072	N/A	TP	N/A	N/A	N/A	N/A	629072 (1978)	629072 (1978)		FP @20 =	5
Dabigatran etexilate													Precision @20 =	0.75
Ergometrine
Tetrofosmin													TP (all predictions) =	142
Bisoprolol													FN (all predictions) =	40
Rivaroxaban													Recall (all predictions) =	0.7802
Vitamin K antagonists
Dipyridamole
Mexiletine hydrochloride
Sotalol
Milrinone
Tirofiban
Disopyramide
Dobutamine
Eptifibatide
Amiodarone
Antidiuretic Hormone Receptor Antagonists
ACE inhibitors
Ajmaline
Valsarran
Trimetazidine
Plasmin Inhibitors
Isosorbide Mononitrate
Bivalirudin
Antithrombotic Agent
Alteplase, recombinant
Sestamibi
Digoxin
Isosorbide
Angiotensin 2 Receptor Blocker
Esmolol
Spironolactone
clopidogrel
Beta-Adrenergic Blocking Agent
Diuretics
Fibrates
Antithrombic Drugs
Ticagrelor
Abciximab
HMG-CoA reductase inhibitor
Enzyme Antagonist
Warfarin
Defibrinotide
Enalaprilat
Prasugrel
Aprotinin
Ticlopidine
Ezetimibe
Glycerol trinitrate
Hypolipidemic Agents
Hydroxyurea
Estropipate
Acepromazine
Candesartan
Lisinopril
cilostazol
vinyl chloride
Quinidine
Hydralazine
Loratadine
Metoprolol
Rosuvastatin Calcium
Vitamin K
Antithrombin III
Agents, Anticoagulant
Aldosterone
Agents, Vasodilator
zirconium oxide
Simvastatin
Angiotensin II
Cholesterol
Clofibrate
Tranhexamic Acid
Triglycerides
Iobenguane
Calcium channel blocking agents
Blood Coagulation Factor XIII
Diltiazem
Urokinase
L-Carnitine
Agents, Antihypertensive
6-Aminocaproic acid
Hemostatic agents
Acetylcysteine
Streptokinase
Losartan
Thiazolidinedione
Lovastatin
Procainamide
Ryanodine
Chlorpromazine
Eicosapentaenoic Acid
Creatine
Verapamil
Lidocaine
Blood-coagulation factor II
Atenolol
Propranolol
Isoproterenol
Blood Coagulation Factor I
Blood coagulation factors
Activated protein C
Atropine
Hyoscyamine
Nifedipine
Blood Coagulation Factor VII
Agents, Vasoconstrictor
Metformin
Creatinine
CD142 Antigens
Catecholamines
Halothane
Oubain
Vitamins
Factor VIII-von Willebrand Factor
Folic acid
Vasopressin
Heparin
Phenobarbital
Cyclophosphamide
Leptin
Noradrenaline
Furosemide
Adenosine
Potassium
Protein S human
Docosahexaenoic Acids
Vitamin D
Doxorubicin
Anhydrous dextrose
Fatty Acids, Omega-3
Antioxidants
Gadolinium
Calcium
Alprazolam
Magnesium
Magnesium
Chlordiazepoxide
Amphetamine
Dioxygen
Blood coagulation factor VIII
Retinal
Oxyphenbutazone
Brompheniramine maleate
Aspartame
Agents, Antiinflammatory
Atomic helium
Nitric oxide
Quilostigmine
Alcohol, Dehydrated
Fluorescein sodium
Histidine
Epinephrine
Acetylcholine
Dopamine
Gamma globulins
Sodium Nitroprusside
Tocopherols
Amlodipine
Element K
Hexachlorophene
Fish oil
Agents, Immunosuppressive
Phosphodiesterase Antagonists
L-Methionine
Agents, Sympathomimetic
Dihydropyridines
Moricizine
Perindopril
Selenium
Diphenhydramine
Thienopyridine Derivatives
ibutilide
Baby Aspirin
Calcidiol
Bretylium Tosilate
Levonorgestrel
Date allergenic extract
Cardiac glycosides
Sex Steroid Hormones
Pimobendan
Chlorothiazide
Ramipril
Birth contraceptive control pills
Prazosin hydrochloride
Pentobarbital
Polyphenols
Estrogens
Orgotein
Dronedarone
Epoprostenol
Levodopa
Naproxen
Antagonists, Protease
ferric chloride
Fentanyl citrate
Proton pump inhibitor
Progestogens
Evolocumab
Niacin
Chloralose
Ionophores
Carbonyl iron
Propofol
Tocainide
Clozapine
Nebivolol
Methyltestosterone
800 Sodium Bicarbonate Powder
Adenosine diphosphate
phenylmethylpyrazolone
Ranitidine
Perhexiline
Bucindolol
Cisapride
L-serine
fluvastatin
empagliflozin
Olive oil
Agents, Tricyclic Antidepressive
Direct Antithrombins
Sildenafil
Aprindine
organic nitrates
Phentolamine
Terfenadine
Recombinant human relaxin
Landiolol
Alirocumab
torsemide
Fondaparinux sodium
Everolimus
ximelagatran
Iodide I-123
Molsidomine
Salbutamol
Sirolimus
Clonidine
Thiopental
Irbesartan
Xamoterol
Acetaminophen
beta Carotene
Carbon dioxide
Anticholinergic Agents
qt-prolonging drugs
Bezafibrate
Telmisartan
Labetalol
pioglitazone
Vesnarinone
Methylergometrine
Botulinum Toxin A
Cyanocobalamin
Famotidine
Desmoteplase
Ammonia N-13
Electrolytes
Agalsidase Beta
Basiliximab
Sevoflurane
Succinylcholine
Isoflurane
Pentoxifylline
Vecuronium
Serine Protease Inhibitors
Trandolapril
Parathyroid Hormone
Nicardipine
Nimodipine
azimilide
Isoetharine
Isoflavone
Ethylurethan
Anaesthetic local
2,6-diaminohexanoic acid
E-4031

## Sheet: Parkinsons_disease
Drug (C)	DDA (E1)	DDA + Manual annotation (A-C) (E2)			DDA + Manual annotation (A-C / A-B-C) (E3)				First Clinical Trial - PMID (Year)	First co-occurrence of A and C in PubMed - PMID (Year)	First literature indicating the usefulness of C for A - PMID (Year)
		Evaluation metric	Literature evidence (PMID)	Other evidence	Annotation	Literature evidence (A-B)	Literature evidence (B-C)	Phenotype (B)
Cut-off date for SKiM execution: March 2019
Parkinson's disease
Anti-dementia Drugs	FP	FP	N/A	N/A	TP	30915012	28891445	Dementia	N/A	17657810 (2007)	N/A		Color coding:
4-hydroxynonenal	FP	TP	8610103	N/A	TP	N/A	N/A	N/A	N/A	8610103 (1996)	8610103 (1996)		DDA
Allyl trisulfide	FP	FP	N/A	N/A	TP	29183391	11326901	Oxidative stress	N/A	N/A	N/A		Manual curation - A-C
Riluzole	FP	TP	8666012	N/A	TP	N/A	N/A	N/A	12039422 (2002)	8289584 (1994)	8666012 (1995)		Manual curation - A-B-C
Ioflupane I(123)	TP	TP	16142248	DDA	TP	N/A	N/A	N/A	15390019 (2004)	14598060 (2003)	15390019 (2004)		Diagnostic agent
Glutathione disulfide	FP	TP	8080242	N/A	TP	N/A	N/A	N/A	N/A	1958264 (1991)	8080242 (1994)		Marker
Rivastigmine	TP	TP	25914281	DDA	TP	N/A	N/A	N/A	11748755 (2001)	11697682 (2001)	11697682 (2001)
Benserazide	TP	TP	7481341	DDA	TP	N/A	N/A	N/A	4275492 (1974)	4217465 (1974)	4217465 (1974)		Types of evaluation
Tempol	FP	TP	16989807	N/A	TP	N/A	N/A	N/A	N/A	12151007 (2002)	16989807 (2006)		E1: Evaluation using DDA
Apocynin	FP	TP	23504289	N/A	TP	N/A	N/A	N/A	N/A	12867501 (2003)	23504289 (2013)		TP @20 =	3
Dismutase, Superoxide	FP	TP	3221244	N/A	TP	N/A	N/A	N/A	16642605 (2006)	6285070 (1981)	3221244 (1988)		FP @20 =	17
Antioxidants	FP	TP	27143379	N/A	TP	N/A	N/A	N/A	2515723 (1989)	6507044 (1984)	3879338 (1985)		Precision @20 =	0.15
Midodrine	FP	FP	N/A	N/A	TP	27091624	7690383	Orthostatic hypotension	N/A	1300258 (1992)	N/A
Domepezil	FP	TP	12111620	N/A	TP	N/A	N/A	N/A	12023410 (2002)	9606486 (1998)	11581527 (2001)		E2: E1 and A-C literature evidence
Modafinil	FP	FP	N/A	N/A	TP	20396641	20396641	Excessive daytime somnolence	N/A	1864252 (1991)	N/A		TP @20 =	15
Glutathione	FP	TP	29101773	N/A	TP	N/A	N/A	N/A	8938817 (1996)	7162692 (1982)	1510368 (1992)		FP @20 =	5
Memantine	FP	TP	24993765	N/A	TP	N/A	N/A	N/A	6734455 (1984)	332193 (1977)	332193 (1977)		Precision @20 =	0.75
Peroxides	FP	TP	1641180	N/A	TP	N/A	N/A	N/A	N/A	6507044 (1984)	3380350 (1988)
Galantamine	FP	TP	24461047	N/A	TP	N/A	N/A	N/A	14533126 (2003)	11581527 (2001)	11581527 (2001)		E3: E1, E2 and A-B-C literature evidence
(R,S)-6-hydroxy-2,5,7,8-tetramethyl-2-chromanecarboxylic acid	FP	FP	N/A	N/A	FP	N/A	N/A	N/A	N/A	N/A	N/A		TP @20 =	19
Menadione / Vitamin K3													FP @20 =	1
Buthionine sulfoximine													Precision @20 =	0.95
ropinirole
Ethopropazine													TP (all predictions) =	70
Thioctic Acid													FN (all predictions) =	7
carbidopa, levodopa drug combination													Recall (all predictions) =	0.9091
Hydrogen peroxide
Iobenguane
sulforafan
Antiparkinson Agents
pramipexole
Dibenziodolium
Diazodicarboxylic Acid Bisdimethylamide
Cholinesterase Inhibitors
Silimarin
Tocopherols
Rotenone
Fludrocortisone
Carbidopa
Levodopa
Dihydronicotinamide adenine dinucleotide phosphate
Coenzyme Q10
resveratrol
Streptozocin
Methylglyoxal
Xanthine
lycopene
1-methyl-4-phenylpyridinium (MPP+)
Polyphenols
Vitamin B5
Nicotinamide adenine dinucleotide
Dopaminergic Agents
epigallocatechin gallate
Curcumin
Quercetin
Green Tea
Botulinum Toxin A
Dioxygen
Deferoxamine mesylate
beta Carotene
Catechin
arsenic trioxide
Dopamine Agonists
Vitamins
Manganese
Melatonin
Amantadine
Carotenoids
Calcium Homeostasis
Acetylcysteine
Glucose-6-Phosphate
Iodide-131
Kainic acid
Olive oil
Xenobiotics
Oxidopamine
Niacin
Antipsychotic Drugs
Carbocysteine
Alprazolam
Hyoscine Hydrobromide
Enzymes
Chelating Agents
L-Carnitine
Gabapentin
Agents, Antiinflammatory
Iodide I-123
Alitretinoin
6-Aminopurine
Haloperidol
Clozapine
Bilirubin
Radioactive drug
Retinal
Baclofen
Apomorphine
Carbonyl iron
Risperidone
Angiotensin II
Copper-63
Aminolevulinic Acid
Zinc
Citrulline
Docosahexaenoic Acids
Creatine
Triglycerides
Racemethionine
Creatinine
Ascorbic Acid
Anhydrous dextrose
Selenium
HMG-CoA reductase inhibitor
Agents, Antiepileptic
Fatty Acids, Omega-3
Urea
Cholesterol
Amphetamine
2-Aminosuccinic acid
Fluorescein sodium
Anticholinergic Agents
Adenosine Triphosphate
Chlordiazepoxide
Succinic acid
Etoposide
Nitrogen
Doxorubicin
Cyanocobalamin
Vitamin J
Ranitidine
Dopamine
Agents, Antidepressive
Acetylcholine
Malathion
L-Arginine
Methyltestosterone
Atomic helium
Iodine-127
L-tyrosine
Calcium
Alcohol, Dehydrated
Quilostigmine
Purified water
Thyroid
Cyclic AMP
L-Methionine
Nitric oxide
Agents, Antihypertensive
Brompheniramine maleate
Serotonin
Epinephrine
Adenosine
Noradrenaline
Basiliximab
Monoclonal antibodies
S-adenosylmethionine
Histidine
Chlorpromazine
Pregabalin
Tetrabenazine
Propidium
Droxidopa
Date allergenic extract
Arachidonic Acid
Harmaline
Grape
Grape seed
Ketamine
Saccharomyces cerevisiae allergenic extract
Phosphocreatine
Rotigotine
Carbachol
Selenite
Quinolinic Acid
Meprobamate
Ozone
Sodium Nitroprusside
Aminoethylsulfonic acid
Propranolol
Tacrine
Sulphur
Phosphatidyl serine
Oxotremorine
Carboquone
olanzapine
Clofibrate
Dinutuximab
Naloxone
Primidone
sodium arsenite
caffeic acid
Phencyclidine
Quetiapine Fumarate
Antilymphocyte Globulin
Gamma globulins
Fructose
entacapone
Zolpidem
Ginkgo biloba extract 761
Leurocristine
Analgesics opioid
Antimycin
Sodium Selenite
Cloperastine Fendizoate
Tetrahydrobiopterin
Trihexyphenidyl
Protoporphyrin
Gangliosides
2-Aminoglutaramic acid
Chlorophyll
phenylmethylpyrazolone
Levetiracetam
Alglucosidase Alfa
Pyrithione zinc
Inositol
Anti-anxiety agents
Allopurinol
Morphine
Bromocriptine
Activated charcoal
astaxanthine
Alkaline Phosphatase
SB-203580
Skeleton
Dibutyryl Adenosine-3',5'-Monophosphate
Methylisothiazolinone
Isotretinoin
Agents, Anticonvulsive
Corticosteroids
Vaginal estrogen
LY-294002
Selegiline
Sestamibi
Armodafinil
Cystine
Adenosine monophosphate
Colloidal silver
Rutin
Antimycin A
Ebselen
Diuretics
Fludeoxyglucose F-18
Dantrolene
Nusinersen
Forskolin
DaTscan
Element K
Thyroglobulin
Methylchloroisothiazolinone
Cyclosporine
Metformin
manganese(III)-tetrakis(4-benzoic acid)porphyrin
Gabapentin enacarbil
L-serine
Leptin
Diazepam
TRX1 drug
Rhodamine 123
Protein A
Cyclophosphamide
Pilocarpine
Dithiothreitol
Fentanyl citrate
Isotonic sodium chloride
Sodium tetradecylsulfate
Valproic acid
Androgen Analogs
Linoleic Acid
Pertussis Vaccine
botulinum B toxin
Iron chelating agents
Corn oil
Salbutamol
Garlic
pimagedine
Proanthocyanidins
Naproxen
Carbamazepine
Valbenazine
Hemin
Zeaxanthin
Acetic acid
Carnosine
Hepatitis A Vaccine
Probucol
Aldosterone
Estrogens
Fish oil
Lovastatin
Fenretinimide
Oxyphenbutazone
Clonazepam
Dobutamine
2-methoxyphenol
Lead acetate
Losartan
Bioflavonoids
Agents, Tricyclic Antidepressive
Prostaglandin E1alpha
Midazolam
Selenocysteine
Fluphenazine
Lidocaine
Ramelteon
Sarcolysin
zopiclone
Folic acid
Metoclopramide
2-tert-butylhydroquinone
Topiramate
Mesenchymal Stem Cells
Hyaluronidase
Caspase Blockers
N-tert-butyl-alpha-phenylnitrone
Mecasermin
Medical air
Topotecan
5 Hydroxytryptamine Uptake Inhibitors
Agents, Anticancer
Cetirizine
Sirolimus
Reserpine
Methyprylon
5-Hydroxytryptophan
Taliglucerase alfa
Hexachlorophene
caffeic acid phenethyl ester
Analgesics
L-Proline
Glucocorticoids
Candida albicans antigen
American ginseng
nitric oxide donors
Simvastatin
Aluminium
Palmitinic acid
Pesticides
Catecholamines
Chromiun
Titanium dioxide
Pergolide
Sumatriptan
Anaesthetic local
Bupivacaine
2,6-diaminohexanoic acid
Veratridine
Interleukin-2 Fusion Protein
Lipid A
DL-alpha tocopherol acetate
Trypan blue
Tocotrienols
Grape Seed Proanthocyanidins
pioglitazone
Eicosapentaenoic Acid
ferulic acid
Hypoxanthine
Ospemifene
4-aminobutyric acid
Triazolam
Ibritumomab
Aripiprazole
rasagiline
Methylphenidate
Progestogens
Indium
Dinoprost

## Sheet: Psoriasis
Drug (C)	DDA (E1)	DDA + Manual annotation (A-C) (E2)			DDA + Manual annotation (A-C / A-B-C) (E3)				First Clinical Trial - PMID (Year)	First co-occurrence of A and C in PubMed - PMID (Year)	First literature indicating the usefulness of C for A - PMID (Year)
		Evaluation metric	Literature evidence (PMID)	Other evidence	Annotation	Literature evidence (A-B)	Literature evidence (B-C)	Phenotype (B)
Cut-off date for SKiM execution: March 2019
Psoriasis
Efinaconazole	FP	FP	N/A	N/A	??	32747079	24752277	Nail disease	N/A	26705439 (2015)	N/A		Color coding:
Belimumab	FP	FP	N/A	N/A	??	32790935*	32807511	Systemic lupus erythematosus	N/A	20947558 (2010)	N/A		DDA
minoxidil topical	FP	FP	27431882	N/A	FP	N/A	N/A	N/A	N/A	22892774 (2012)	N/A		Manual curation - A-C
Alosetron	FP	FP	N/A	N/A	FP	N/A	N/A	N/A	N/A	N/A	N/A		Manual curation - A-B-C
Balsam of Peru	FP	FP	1466631	N/A	FP	N/A	N/A	N/A	N/A	294096 (1979)	N/A		May be a positive association
vismodegib	FP	FP	N/A	N/A	??	31603636	32713089	Basal cell carcinoma	N/A	25819232 (2015)	N/A		Negative association
Diacerein	FP	TP	27612773	N/A	TP	N/A	N/A	N/A	N/A	19217337 (2009)	27612773 (2016)
Glucosamine sulfate	FP	FP	N/A	N/A	??	32827608	32776178	Joint disease	N/A	N/A	N/A		*Co-occurrence only
Atlizumab	FP	FP	20731650	N/A	FP	N/A	N/A	N/A	N/A	15965816 (2005)	N/A
Methylchloroisothiazolinone	FP	FP	N/A	N/A	FP	30207438*	27709700	Dermatitis	N/A	24420805 (2014)	N/A		Types of evaluation
American house dust mite extract	FP	FP	N/A	N/A	FP	30207438*	31007602	Dermatitis	N/A	N/A	N/A		E1: Evaluation using DDA
Dermatophagoides pteronyssinus antigen	FP	FP	N/A	N/A	FP	30207438*	6609976	Dermatitis	N/A	24304358 (2014)	N/A		TP @20 =	3
Zotarolimus	FP	FP	N/A	N/A	TP	32757303*	32146703	Lesions	N/A	N/A	N/A		FP @20 =	17
Artemisia vulgaris, Homeopathic preparation	FP	FP	N/A	N/A	??	30207438*	28892018	Dermatitis	N/A	N/A	N/A		Precision @20 =	0.15
Amorolfine	FP	FP	N/A	N/A	??	32747079	20347657	Nail disease	N/A	10939306 (2000)	N/A
Methylisothiazolinone	FP	FP	N/A	N/A	FP	30207438*	30653676	Dermatitis	N/A	24420805(2014)	N/A		E2: E1 and A-C literature evidence
Tofacitinib	TP	TP	N/A	N/A	TP	N/A	N/A	N/A	19225543 (2009)	19225543 (2009)	19225543 (2009)		TP @20 =	4
Vedolizumab	FP	FP	28107281	N/A	FP	N/A	N/A	N/A	N/A	25579431 (2014)	N/A		FP @20 =	16
Certolizumab	TP	TP	N/A	N/A	TP	N/A	N/A	N/A	22413944 (2012)	17129819 (2006)	19707435 (2008)		Precision @20 =	0.2
Leflunomide	TP	TP	N/A	N/A	TP	N/A	N/A	N/A	15149511 (2004)	10076546 (1998)	17039176 (2001)
Poison ivy antigen													E3: E1, E2 and A-B-C literature evidence
Tegaserod													TP @20 =	5
Dermatophagoides pteronyssinus antigen p 1													FP @20 =	9
Desloratadine													Precision @20 =	0.3571
Auranofin
Apremilast													TP (all predictions) =	87
Minoxidil													FN (all predictions) =	8
Bexarotene													Recall (all predictions) =	0.9158
Fexofenadine
Mesalamine
Secukinumab
Rifamycin L 105SV
Antileukotrienes
Ethopropazine
Agents, Antiasthmatic
Fluticasone
Everolimus
Fluticasone propionate
Aminosalicylic Acid
Mercaptopurine
Chlorhexidine
ZVAD-fluoromethylketone
Thioguanine
Beclomethasone
Budesonide
Fibrates
Itrizole
Apis mellifera antigen
Activated protein C
Propidium
Triclosan
Erlotinib
Eicosapentaenoic Acid
Mycophenolate mofetil
Vorinostat
Antibodies, Antineutrophil Cytoplasmic
Mycophenolate
Sphingosine
Azathioprine
Griseofulvin
HMG-CoA reductase inhibitor
Thiazolidinedione
Anti EGFR
Polyphenols
Calcineurin Antagonists
Gefitinib
Chenodeoxycholic Acid
Myristate Acetate, Phorbol
Apple
Protein S human
Fluoride
Agents, Antimalarial
Date allergenic extract
Chlordiazepoxide
Birth contraceptive control pills
Fluconazole
Antifungal agents
Vitamin D
Agents, Antihypertensive
Guanine
Levocetirizine
Erythromycin Ethylsuccinate
Nevirapine
Linaclotide
Romidepsin
Etoposide
Alfa1 antitrypsin
Hazelnut allergenic extract
Clofibrate
Difluorostannylene
JAK Inhibitors
Cephalexin
Skeleton
anti-itch
Potato
Lactulose
Pokeweed
Bucillamine
Ozone
Efalizumab
Monobenzone
montelukast
Levetiracetam
Punica granatum antigen
Penicillins
L-serine
Phosphodiesterase 4 Inhibitors
Tavaborole
Thymine
Nasal Sprays
clindamycin topical
Immunological Factors
Cholestyramine
Xylitol
Nedocromil Sodium
Citrus sinensis antigen
centrum
Lubiprostone
ACE inhibitors
Alkylating agents
Sorafenib
Sulfamethoxazole and trimethoprim
Resolvin E1
Cherry

[truncated: 12 more sheets: CHF, COPD, Emphysema, Asthma, Stroke, Influenza, Pneumonia, CKD, Kidney_failure, Suicide, LRI, Tuberculosis]
